# Evidence against tetrapod-wide digit identities and for a limited frame shift in bird wings

Thomas A. Stewart<sup>1,2\*</sup>, Cong Liang<sup>3</sup>, Justin L. Cotney<sup>4</sup>, James P. Noonan<sup>5</sup>, Thomas J. Sanger<sup>6</sup>,  
and Günter P. Wagner<sup>1,3\*</sup>

<sup>1</sup>Department of Ecology and Evolutionary Biology, Yale University

<sup>2</sup>Minnesota Center for Philosophy of Science, University of Minnesota

<sup>3</sup>Systems Biology Institute, Yale University

<sup>4</sup>Department of Genetics and Genome Sciences, UConn Health

<sup>5</sup>Department of Genetics, Yale School of Medicine

<sup>6</sup>Department of Biology, Loyola University in Chicago

\*To whom correspondence should be addressed

**Summary:** In crown group tetrapods, individual digits are homologized in relation to a pentadactyl ground plan. However, testing hypotheses of digit homology is challenging because it is unclear whether digits develop with distinct and conserved gene regulatory states. Here we show dramatic evolutionary dynamism in the gene expression profiles of digits, challenging the notion that five digit identities are conserved across amniotes. Transcriptomics of developing limbs shows diversity in the patterns of genetic differentiation of digits, although the anterior-most digit of the pentadactyl limb has a unique, conserved expression profile. Further, we identify a core set of transcription factors that are differentially expressed among the digits of amniote limbs; their spatial expression domains, however, vary between species. In light of these results, we reevaluate the frame shift hypothesis of avian wing evolution and conclude that only the identity of the anterior-most digit has shifted position, suggesting a 1,3,4 digit identity in the bird wing.

Limbs evolved from paired fins in the Late Devonian, and early tetrapods possessed more than five digits on the fore- and hindlimbs<sup>1,2</sup>. Later in the tetrapod stem, a pentadactyl pattern stabilized as the ground plan for the limb. Individual digits are homologized between species and between fore- and hindlimbs in reference to this pentadactyl ground plan<sup>3</sup>. However, it remains controversial whether such hypotheses of identity correspond to distinct developmental programs among the digits (developmental identities), or just the relative position of digits along the limb's anteroposterior axis (positional identities)<sup>4-7</sup>. Below we use the symbols D1, D2, etc. to indicate positional identities in the pentadactyl ground plan, rather than to indicate developmental

39 identities.

40 The anterior-most digit (D1) (e.g., human thumb) appears to have a distinct  
41 developmental identity as compared to the more posterior digits (D2-D5). D1 is marked by a  
42 unique gene expression profile—low expression of *HoxD11* and *HoxD12* and high expression of  
43 *Zic3* relative to other digits<sup>7-9</sup>—and it appears able to develop independently of *Shh* signaling<sup>9-11</sup>.  
44 Additionally, analysis of morphological variation in primates identified a high degree of variational  
45 independence of D1 relative to the more posterior digits<sup>12</sup>. Models of posterior digit identity have  
46 been proposed according to the relative exposure of limb bud mesenchymal cells to *Shh*, which  
47 emanates from the zone of polarizing activity prior to digit condensation<sup>10,11</sup>. However, broadly  
48 conserved marker genes for individual posterior digits have not been identified in the interdigital  
49 mesenchyme, the signaling center that patterns digits<sup>13,14</sup>. For instance, while the combinatorial  
50 expression of *Tbx2* and *Tbx3* is necessary to generate the phenotypes of D3 and D4 in chicken  
51 hindlimb<sup>15</sup>, it is questionable whether these developmental identities are conserved in other  
52 species, like mouse, with limited morphological differentiation of the posterior digits.

53 Debates of digit homology are especially challenging to resolve when limbs have fewer  
54 than five digits. This problem has been most actively investigated in the tridactyl avian wing,  
55 because of the appearance of conflict between paleontological and developmental data<sup>16</sup>. The  
56 fossil record of theropod dinosaurs shows a clear pattern of reduction of the posterior two digits in  
57 the lineage leading to birds, yet digits in the wing have been described as developing in the  
58 middle three positions of a pentadactyl developmental groundplan<sup>17-22</sup>. To explain this  
59 discrepancy, the frame shift hypothesis was proposed<sup>16</sup>. It posited that a homeotic shift occurred  
60 in the avian stem such that the developmental programs that were once expressed in D1, D2,  
61 and D3 are now executed in the digits that develop in positions D2, D3, and D4 respectively.  
62 Comparative analyses of gene expression have found support for this hypothesis: *in situ*  
63 hybridization and transcriptomics have revealed similarity between the anterior digit of the adult  
64 avian wing, which develops in position D2, and D1 of other limbs<sup>7,23</sup>.

65 Studies that aim to test digit homology assume that developmental identities (1) were  
66 present in a common ancestor, (2) are conserved among the descendent lineages, and (3) are  
67 reflected in gene expression profiles. Here we present comparative transcriptomic data from five  
68 species that challenge these assumptions among amniotes by documenting a surprising diversity  
69 of digital gene expression profiles. Analyses further reveal a core set of transcription factor genes  
70 differentially expressed among digits and suggest a new model for the evolution of the bird wing.

71

72

## 73 **Results**

### 74 ***Disparity in digit expression profiles***

75 To characterize the gene expression profiles of digits in pentadactyl amniote limbs, we  
76 sequenced RNA of developing digits and their associated posterior interdigital mesenchyme from  
77 the forelimbs of mouse, green anole (*Anolis*), and American alligator (Fig. 1 a). In each of these  
78 species, hierarchical cluster analysis (HCA) and principal component analysis (PCA) of the  
79 transcriptomes shows a weak signal of sample clustering by digit (Extended Data Fig. 1). The  
80 strongest signals of digit-specific expression profiles are observed in D1 of mouse and D4 of the  
81 alligator. Groupings of the other digit samples are not well supported. We hypothesized that this  
82 result might imply that any signal of gene expression differentiation among digits is overwhelmed  
83 by noise when all genes are considered, because most genes are likely irrelevant to the  
84 developmental identity of digits. If such a signal exists, we predict that it will be reflected  
85 preferentially in the expression of transcription factor and signaling genes. Therefore, we again  
86 performed HCA and PCA on the samples of each species, this time using two gene lists: a  
87 curated set of known limb patterning genes that are sensitive to *Shh* signaling (N=159)<sup>24</sup>, and  
88 transcription factor genes (N=2183)<sup>25</sup>.

89 In mouse and alligator, HCA and PCA of known limb patterning genes results in  
90 clustering of samples by digit (Fig. 1 b, c). In mouse, D1 is strongly differentiated from the other  
91 digits. In alligator, an anterior cluster, comprised of digits D1, D2, and D3, is differentiated from a  
92 posterior cluster, comprised of D4 and D5. By contrast, analysis of known limb patterning genes  
93 in *Anolis* shows weak clustering of samples by digits (Fig. 1 d). This suggests a level of  
94 homogeneity among *Anolis* digits that is not observed in either mouse or alligator. Analysis of all  
95 transcription factors for these species yields comparable results to what is recovered for limb  
96 patterning genes, but with generally lower adjusted uncertainty values in HCAs (Extended Data  
97 Fig. 2).

98 To further test the hypothesis that there is limited gene expression differentiation among  
99 *Anolis* digits as compared to the other pentadactyl limbs sampled, we took advantage of a result  
100 from multiple testing theory<sup>26</sup>: If a differential expression analysis is conducted on two sample  
101 types that are not genetically differentiated, then the resultant frequency distribution of *p* values  
102 will be uniform within the [0, 1] interval. On the other hand, if there are truly differentially  
103 expressed genes among the compared sample types, then the *p* value distribution is expected to  
104 be biased towards *p*=0. We conducted differential expression analyses of adjacent digits of the  
105 forelimbs of mouse, alligator, and *Anolis* using EdgeR<sup>27,28</sup> and inspected *p* value distributions  
106 (Fig. 2). In *Anolis*, all comparisons of adjacent digits result in *p* value distributions that are close to  
107 uniform, suggesting that there is very weak, if any, genetic differentiation of adjacent fingers. We  
108 note that this result is independent of any *p* value significance threshold or false discovery  
109 correction method. By contrast, most of adjacent pairwise digit comparisons for mouse and  
110 alligator show a strongly biased *p* value distribution, the exception being D2 and D3 in mouse.

111 This is consistent with the idea that, in general, most digits in a limb are genetically differentiated,  
112 while in *Anolis* genetic differentiation of digits is minimal or absent.

113         Given that these three limbs differ in their broad patterns of gene expression  
114 differentiation of digits, we next asked whether individual genes show divergent or constrained  
115 expression patterns across the forelimb in the different species. Specifically, we compared  
116 adjacent digits, identified differentially expressed transcription factor genes, and then assessed  
117 which differences are shared among mouse, alligator, and *Anolis*. Of the 1133 transcription factor  
118 genes that are one-to-one orthologs in these three species, only four genes are differentially  
119 expressed in a conserved pattern among corresponding adjacent digits (Fig. 3). There are three  
120 genes that differentiate D1 from D2 (*Hoxd11*, *Hoxd12*, and *Sall1*), and there is one that  
121 differentiates D4 from D5 (*Tbx15*) in all three species. No transcription factors are differentially  
122 expressed in all three species between the median digits (*i.e.*, differentiating D2 from D3, or D3  
123 from D4).

124         If the homogeneity observed among *Anolis* forelimb digits is a derived condition, then this  
125 could limit our ability to diagnose plesiomorphic developmental identities. Therefore, we also  
126 considered the chicken hindlimb, which has digits D1-D4. We reanalyzed published  
127 transcriptomic data for hindlimb digits<sup>7</sup>, mapping reads to a new chicken genome (Galgal5.0)<sup>29</sup>.  
128 HCA and PCA of digits of the chicken hindlimb show a unique pattern of similarity as compared to  
129 pentadactyl limbs: an anterior cluster, comprised of D1 and D2, is differentiated from the posterior  
130 cluster, comprised of D3 and D4 (Extended Data Fig. 3). Similar to alligator, this pattern of  
131 correspondence among the digits is stable across the developmental window sampled (st. 28–  
132 31). As before, we tested for differential expression in adjacent digits and identified one-to-one  
133 orthologous transcription factor genes that are differentially expressed at the same position  
134 between mouse and alligator forelimb and chicken hindlimb (Fig. 4 a, Extended Data Fig. 4). Of  
135 the 1049 transcription factor genes, ten differentiate D1 and D2 (n=10), none distinguish D2 and  
136 D3, and one (*Tbx3*) differentiates D3 from D4 in all three species (Fig. 4 a).

137         Overall, data from these four species do not support the hypothesis that amniote digits  
138 have conserved developmental identities. The exception appears to be D1, which likely had a  
139 distinct developmental program in the most recent common ancestor of amniotes. We further  
140 tested whether D1 has a conserved gene expression profile by sequencing RNA from developing  
141 human fore- and hindlimb, which were partitioned into D1 and the posterior digital plate (D2-5). Of  
142 the ten genes identified above as differentiating D1 and D2, six show conserved patterns of  
143 expression change at this position: in all limbs sampled *Hand2*, *Hoxd11*, *Hoxd12*, and *Tfap2b* are  
144 more highly expressed in D2 than D1, and *Alx1* and *Pax9* are more lowly expressed in D2 than  
145 D1 (Fig. 4 b).

146         T-box family genes are predicted to regulate the identities of posterior digits<sup>15</sup>. Our data  
147 provide some support for the hypothesis that this function is conserved across amniotes (Fig. 4

148 c). *Tbx2*, which was previously shown to regulate posterior digit identity in the chicken hindlimb<sup>14</sup>,  
149 shows divergent patterns of expression in the posterior digits of other species. *Tbx3* differentiates  
150 D3 from D4 in mouse, alligator, and chicken hindlimb, and the likelihood that it was recovered by  
151 chance alone is  $7.2 \times 10^{-6}$  (binomial test); however, it is not differentially expressed at this position  
152 in *Anolis* forelimb. *Tbx15* differentiates D4 from D5 among pentadactyl limbs (Fig. 3), and the  
153 likelihood that it was recovered by chance alone is  $1.9 \times 10^{-5}$  (binomial test).

154 Analyses aiming to identify genes that are conserved and differentially expressed at a  
155 particular position within the limb (e.g., between D1 and D2 in mouse, alligator, and *Anolis*) can  
156 be affected by the threshold stringency of the false discovery rate (FDR). Binomial tests, as  
157 presented above, are one means of accounting for this. We present a second strategy for  
158 assessing whether genes identified as differentially expressed in one species behave similarly in  
159 other species that does not depend on a particular FDR threshold being reached in all species.  
160 Specifically, we consider the genes identified as differentially expressed in one species between  
161 adjacent digits (e.g., in mouse, 129 transcription factor genes are identified between D1 and D2).  
162 Then we ask how expression fold change between the two digits in the original species compares  
163 to expression fold change of the same genes and also a set of randomly selected genes of similar  
164 expression levels in other species. To make these comparisons, we calculated Pearson's  
165 correlation of the fold changes between the original genes *versus* each of the two gene sets  
166 (orthologs and random genes) in other species. Results of this approach broadly mirror those  
167 described, above.

168 Among the pentadactyl limbs sampled, genes differentially expressed between D1 and  
169 D2 behave consistently between species and can be distinguished from random genes, and  
170 comparisons of the more posterior digits do not clearly distinguish orthologs from random genes,  
171 (Extended Fig. 5 a-d). If chicken hindlimb is considered instead of the *Anolis* forelimb, we again  
172 obtain strong support for conserved behavior of genes at the position D1 and D2, weaker support  
173 for conserved gene behavior between D2 and D3, and comparisons at the position D3 and D4 do  
174 not clearly distinguish orthologs from random genes (Extended Fig. 5 e-g). Thus, testing for  
175 genes that are differentially expressed at the same position can recover genes that behave  
176 consistently across species (i.e., *Tbx15* between D4 and D5 among pentadactyl limbs, and *Tbx3*  
177 between D3 and D4 between mouse, alligator, and *Anolis*), while comparisons of all genes  
178 differentially expressed for these species might not show evidence of broadly conserved profiles.  
179 Conversely, while we might obtain modest evidence for shared behavior among differentially  
180 expressed genes (i.e., between digits D2 and D3 among mouse, alligator, and chicken), there  
181 might be no individual genes recovered as differentially expressed among the taxa at that  
182 position. However, both types of comparisons between digits D1 and D2 paint the consistent  
183 picture that D1 exhibits a shared digit identity across these limbs.

184

185

### 186 ***A core set of digit patterning genes***

187           Given our result that the gene expression profile of digits is evolutionarily dynamic, we  
188 next tested whether a conserved set of genes might pattern amniote autopods, albeit in different  
189 spatial patterns. Specifically, we reanalyzed transcriptomic data of mouse, alligator and *Anolis*  
190 forelimbs and chicken hindlimb, conducting ANOVA to test for genes that were differentially  
191 expressed between any two digits in the limb, not just adjacent digits. This analysis recovers  
192 genes that are differentially expressed between some digits in the limb, but it does not indicate  
193 between which digits a gene is differentially expressed. The number of differentially expressed  
194 transcription factor genes differs greatly among species: 356 in mouse, 377 in alligator, 34 in  
195 *Anolis*, and 144 in the chicken hindlimb (FDR <0.05, Fig. 5 a). This is consistent with previous  
196 results (above) that showed the *Anolis* forelimb to be more homogeneous than other sampled  
197 limbs. Therefore, we focused on transcription factor genes that are one-to-one orthologous  
198 between mouse, alligator, and chicken and identified a set of 49 genes that are differentially  
199 expressed in these three limbs (Fig. 5 b). We call these *conserved differentially expressed genes*  
200 (CDEGs). The expected number of overlapping genes among these sets by chance alone is 7.57,  
201 and the probability of observing an overlap of 49 genes or more by chance is  $<10^{-6}$  (binomial  
202 test). Thirteen of the CDEGs are included in the list of limb patterning genes sensitive to *Shh*  
203 signaling<sup>24</sup>. To assess whether this gene set is biologically meaningful, we performed HCA and  
204 PCA on the samples of each species using the 49 CDEGs. In *Anolis*, we considered the subset  
205 (n=42) that are one-to-one orthologs across all four species. In combination, CDEGs can produce  
206 unique expression profiles of each digit within a limb (Fig. 5 c) and show patterns similar to those  
207 generated by analyses of known limb patterning genes (Fig. 1 b-d, Extended Fig. 3 c).

208           Analysis of amniote limbs showed that targeted gene lists generated either  
209 experimentally (*i.e.*, known limb patterning genes<sup>24</sup>), by gene ontology (*i.e.*, all transcription  
210 factors<sup>25</sup>), or statistically (*i.e.*, 49 CDEGs), can reveal distinct gene expression profiles among  
211 digits of a limb, which are not observed in the full transcriptome. The spatial digit expression  
212 profiles of these genes, however, is species specific. In light of these results, we reevaluated the  
213 frame shift hypothesis of bird wing origin<sup>16</sup>.

214

215

### 216 ***Reevaluating the frame shift hypothesis***

217           The frame shift hypothesis predicts that the three digits of the adult avian forelimb, which  
218 we refer to here as D2, D3, and D4 according to their developmental position<sup>17-22</sup>, will express the  
219 developmental programs observed in the digits D1, D2, and D3 of other limbs<sup>16</sup>. This hypothesis  
220 was tested previously by analyzing the transcriptomes of chicken fore- and hindlimb digits<sup>7</sup>. That

221 study found correspondence between forelimb D2 and hindlimb D1, consistent with the frame  
222 shift hypothesis. However, correspondence of more posterior digits was not detected<sup>7</sup>.

223 We re-analyzed published transcriptomic data of digits from the chicken forelimb<sup>7</sup> and  
224 compared them to digits of the chicken hindlimb. Surprisingly, when the 49 CDEGs are  
225 considered, gene expression profiles of forelimb digits D2, D3, and D4 correspond to hindlimb  
226 digits D1, D3, and D4, respectively (Fig. 6 a). Analyses of transcription factor genes and known  
227 limb patterning genes show a consistent pattern (Extended Data Fig. 6). Similarity between the  
228 posterior two digits of the chicken fore- and hindlimb (D3 and D4 in each limb) can also be  
229 observed in the expression patterns of numerous individual genes that are known to be involved  
230 in the patterning of digits (Fig. 6 b).

231 To assess whether spatial gene expression profiles can be conserved between the fore-  
232 and hindlimbs of a species, even when they differ in digit number, we performed *in situ*  
233 hybridization in alligator. We evaluated expression of *Tbx2*, *Tbx3*, and *Sall1*, three transcription  
234 factor genes identified as differentially expressed between alligator forelimb D3 and D4. *In situ*  
235 hybridization confirms their expression in the posterior interdigital mesenchyme (Fig. 6 c) and  
236 shows conserved positional expression patterns for *Tbx3* and *Sall1* between the forelimb and  
237 hindlimb. It is unclear whether the pattern also holds for *Tbx2*, where difference in expression  
238 level detected from RNA sequencing appear to reflect the proximodistal extent of gene  
239 expression.

240 We also tested the frame shift hypothesis by comparing the limbs of chicken to the  
241 pentadactyl forelimbs of other species. For each pentadactyl species, PCA were run using the  
242 CDEGs (49 in mouse and alligator, and 42 in *Anolis*), and chicken samples were projected into  
243 the reference PCA plane as supplementary observations. CDEGs were used because they can  
244 produce digit-specific expression profiles for mouse and alligator forelimb and chicken hindlimb,  
245 and because these patterns are reflective of more inclusive gene lists, as described above. These  
246 projections show that the digits D2, D3, and D4 of the bird wing consistently fall into regions of the  
247 PCA plane corresponding to the digits D1, D3, and D4 of other limbs. Although it is difficult to  
248 differentiate D3 and D4 expression in all species, it is clear that D3 of the chicken forelimb does  
249 not correspond in its expression profile of these genes to the D2 of the other limbs sampled (Fig 6  
250 d).

251 Some have proposed on the basis of *Shh* expression that the digits in the avian wing are  
252 of positions D1, D2, and D3<sup>30</sup>. This model, like the frame-shift hypothesis, predicts wing digits  
253 have developmental identities corresponding to the digits D1, D2, D3 of other limbs. The results  
254 presented here as well, as the morphological evidence for five digit condensations<sup>17-22</sup>, suggest  
255 *Shh* expression is not a conserved marker of digit identity or position in limbs with highly reduced  
256 digit number.

257

258

## 259 **Discussion**

260 Serial homologs are repeated body parts, generated by a common developmental  
261 program. In the case of digits, chondrogenic condensations are generated by a reaction-diffusion  
262 Turing-type mechanism<sup>31,32</sup>. Serial homologs can be developmentally identical (homomorph  
263 parts) or they can assume distinct developmental identities through the differential expression of  
264 regulatory genes (paramorph parts)<sup>33</sup>. The degree to which serial homologs are individuated can  
265 be difficult to assess from morphology alone, because the same developmental program can lead  
266 to different morphological outcomes depending on the developmental environment<sup>34,35</sup>. However,  
267 detailed analyses of gene expression and regulation can identify developmentally individualized  
268 body parts.

269 In this study, we performed a comparative analysis of whole genome expression data to  
270 test the hypothesis that digits have conserved developmental identities. In interpreting our data,  
271 we acknowledge that gene expression does not demonstrate gene function. Nevertheless, a lack  
272 of differential gene expression between digits is evidence of a lack of developmental  
273 individuation, and a high level of differential expression (particularly in transcription factor and  
274 signaling genes) is evidence for distinct gene regulatory states.

275 The developmental stages studied here were selected on the basis of previous  
276 experimental work. Dahn and Fallon<sup>13</sup> demonstrated in the chicken hindlimb that genes  
277 expressed in the interdigital mesenchyme regulate digit-specific morphologies, including the  
278 number of phalanges. Subsequent work in the chicken hindlimb showed that this signaling, in the  
279 phalanx-forming region, is active between stages 27 and stage 30<sup>14</sup>. Here, we analyzed the  
280 expression profiles chicken hindlimb digits of stages 28 and 31 and showed that expression  
281 profiles of limb patterning genes and transcription factor genes are stable over this developmental  
282 window (Fig. 4 b, c; Extended Data Fig. 3 b, c; Fig. 6 b). Thus, signals pertinent to digit patterning  
283 continue to be expressed at late stages of limb development, even after phalanges have formed.  
284 Analyses of alligator show a consistent pattern: between stages 18 and 19.5, the expression  
285 patterns of limb patterning genes and transcription factor genes are stable as assessed by HCA,  
286 PCA, and in profiles of genes of interest (Fig. 1 c, Extended Data Figure 2, Fig. 4 b, c, Fig. 6 c).  
287 Although not all species were sampled at multiple time points, we argue on the basis of these  
288 comparisons in chicken and alligator that it is unlikely our conclusions on the evolution and  
289 development of digit identity are biased by temporal dynamism in gene expression within the  
290 developmental window studied here.

291 Our analyses show that patterns of regulatory gene expression in digits are evolutionarily  
292 dynamic (Fig. 7 a). The developmental identities of digits are evolving across amniotes and can  
293 be lineage-specific. The exception is a conserved developmental identity that characterizes the  
294 D1 of mouse, alligator and *Anolis* forelimbs, chicken hindlimb, and human fore- and hindlimbs



295 (Fig. 4 b). This digit identity is unlikely to be an edge-effect (*i.e.*, merely a corollary to which digit  
296 occupies the most-anterior position in a limb). In the rabbit hindlimb, which has lost the digit D1,  
297 this developmental identity is not observed in D2, despite that digit now occupying the anterior-  
298 most position in the limb<sup>36</sup>. Additionally, in the hindlimb of Silkie chicken mutants, which have  
299 additional anterior digit on their foot, developmental identity is preserved in the digit of the  
300 morphology of the native D1, despite that digit no longer occupying the anterior-most position in  
301 the limb<sup>23</sup>.

302 In contrast to D1 we do not find support for conserved digit identities in the more posterior  
303 digits. Among the pentadactyl limbs we studied, no genes consistently differentiate the median  
304 digits (D2, D3, and D4) from one another. And when we consider the chicken hindlimb rather than  
305 *Anolis*, because similarity among *Anolis* digits might be secondarily derived, we find no gene  
306 differentiates D2 and D3, and only one gene (*Tbx3*) differentiates D3 and D4. There is limited  
307 evidence for a conserved developmental identity for digit D5. A single gene (*Tbx15*) is  
308 differentially expressed between D4 and D5 among mouse, alligator and *Anolis*, however more  
309 genes are shared between just mouse and alligator (Fig. 3, Extended Data Fig 4 b).

310 Our analyses also identified a core set of regulatory genes, which we call CDEGs, that  
311 are differentially expressed among digits, although species differ in which digits differentially  
312 express the genes (Fig. 5). We propose that the CDEGs represent a “digit differentiation tool kit”  
313 deployed for the individuation of different sets of digits in different lineages, depending on the  
314 adaptive needs of the species. Between mouse and human, 28 the 49 CDEGs have  
315 demonstrated roles in patterning distal limb skeleton (Extended Data Table 1). Of the CDEGs,  
316 only 15 are differentially expressed across the *Anolis* forelimb. This homogeneity appears to be a  
317 derived condition among the taxa sampled, as it is unlikely that the other 34 CDEGs reflect  
318 homoplasy between mammals and archosaurs.

319 In *Anolis* most fingers, though they differ in number of phalanges, lack developmental  
320 individuality and, thus, appear to be homomorphic. We consider a number of alternative, non-  
321 biological explanations for the unique *Anolis* pattern; however, these do not adequately explain  
322 homogeneity in the data. For example, it is possible that the limbs were sampled at too-late a  
323 stage, after signals pertinent to digit patterning were expressed. We regard this explanation as  
324 unlikely because, as discussed above, in limbs sampled at multiple time points gene expression  
325 profiles are stable over broad developmental window, through late stages of development.  
326 Another possible alternative explanation is that variance among *Anolis* samples is greater as  
327 compared to other data sets, and that this diminished our ability to detect differentially expressed  
328 genes. We assessed this possibility in two ways. First, we repeated all differential expression  
329 analyses considering only the two most highly correlated samples of each digit for mouse,  
330 alligator and *Anolis*, which consistently had correlation values above 0.99 (Extended Data Fig. 7  
331 a). Results of these two-sample comparisons are consistent with analyses of all three samples

332 (e.g., compare Fig. 3 and Extended Data Fig. 7 b), indicating that the unique *Anolis* pattern is not  
333 an artifact of sample quality.

334         Second, we evaluated the dispersion values of our samples. Dispersion is a measure of  
335 variance among samples that is calculated by the software edgeR. This parameter affects the  
336 sensitivity of differential expression analyses (e.g., a set of samples with high dispersion will have  
337 low sensitivity in tests of differential expression), and it can be impacted by specimen pedigree<sup>37</sup>.  
338 *Anolis* embryos were collected from non-siblings, whereas mouse and alligator samples were  
339 collected from siblings. As expected, the mean dispersion value of *Anolis* samples is greater than  
340 either mouse or alligator (Extended Data Fig. 8). The *Anolis* mean dispersion value is consistent  
341 with other data sets in which samples were collected across a population<sup>37</sup>. However, such  
342 differences in dispersion cannot explain the unique *Anolis* pattern. Chicken hindlimb digits, which  
343 were also collected from non-siblings and have dispersion values comparable to *Anolis*  
344 (Extended Data Figure 8), show patterns of differential expression comparable to mouse and  
345 alligator (Fig. 2, Extended Data Fig. 4 a, Fig. 5 a). Thus, neither timing, sample quality, nor  
346 pedigree appears sufficient to explain the *Anolis* data. It appears that homogeneity among the  
347 digits reflects biological reality, and digits in this lineage have undergone secondary  
348 homogenization. Other lineages might have similarly experienced loss of digit identities (e.g.,  
349 ichthyosaur forelimbs), and the secondary homogenization of paramorphic serial homologs has  
350 been described in other anatomical systems (e.g., the homodont dentition in cetaceans<sup>38</sup> and the  
351 snake vertebral column<sup>39</sup>).

352         Finally, we reassessed the homology of fingers in the bird wing and obtain the novel  
353 result that the three digits reflect a combination of translocated digit identities and conserved  
354 identities. The anterior-most digit in the chicken wing, although it develops in position D2<sup>17-22</sup>,  
355 exhibits a gene expression profile seen in the D1 of the other limbs; this is consistent with  
356 previous studies and the frame shift hypothesis<sup>7,23</sup>. The gene expression profiles of the posterior  
357 wing digits (D3 and D4), however, do not show evidence of translocation. This is observed most  
358 clearly by comparison to the hindlimb of the chicken, with the pattern recovered when three  
359 different gene lists are considered (transcription factors, limb patterning genes, and CDEGs). As  
360 discussed above, although we cannot diagnose conserved gene expression profiles for the digits  
361 D3 and D4 across amniotes, we obtain indirect evidence for a correspondence of avian digits to  
362 the digits D1, D3, and D4 of other amniote limbs (Fig. 6 d). The possibility of a 1-3-4 pattern of  
363 digit identity in the bird wing has been proposed previously<sup>40</sup> on the basis of experimental  
364 studies<sup>41</sup>. Still, this pattern of correspondence is surprising. It challenges the predominant  
365 hypotheses of digit identity and suggests an alternative scenario for how limb development  
366 evolved in the lineage leading to Aves (Fig. 7 b). Significantly, it indicates that diagnoses of digit  
367 identity from the paleontological record and hypotheses of digit identity based upon gene  
368 expression profiles have a more complex relationship than previously anticipated.

369           The frame shift hypothesis is an integrative model. It aimed to explain an apparent  
370 incongruity between paleontological and neontological data sets by providing a developmental  
371 account for evolutionary transformation rooted in a mechanistic basis of homology. Our results  
372 show that any such integrative model will be more complicated than previously presumed. Moving  
373 forward, we recommend systematic reappraisal of phalangeal and metacarpal characters along  
374 the avian stem. It has been proposed that patterns of digit reduction in theropods might be more  
375 complex than is generally assumed<sup>40</sup>. For example, study of the ceratosaur *Limusaurus* led to the  
376 hypothesis that in basal tetanurans metacarpal characters correspond to identities 2-3-4, while  
377 phalanges have identities 1-2-3<sup>41</sup>, although specifically how this taxa informs the plesiomorphic  
378 avian condition has been contested<sup>42</sup>. Additionally, we recommend continued, broad taxonomic  
379 sampling in studies of limb development. Building expanded, comparative data sets will allow for  
380 quantification of homoplasy between species and between the fore- and hindlimbs, which could  
381 impact hypotheses of digit identity presented here. Finally, continued functional genetic studies  
382 are required to understand how digit-specific phenotypes are regulated and to test the hypothesis  
383 that CDEGs play privileged roles in establishing gene regulatory states in the interdigital  
384 mesenchyme.

385           The question of how to diagnose the digits of the avian wing is among the oldest in  
386 comparative morphology<sup>3,43</sup>. This study tests several assumptions that underlay many  
387 contemporary studies of the homology and developmental identity of digits. Indeed, it is the first to  
388 comparatively analyze the full gene expression profiles of digits of different species. Such data,  
389 and a willingness to consider hypotheses that previously might have been regarded as heterodox,  
390 is required for the testing and refinement of integrative theories on the nature of limbs.  
391

392 **Methods**

393 Limbs of each species were sampled after digital condensations have formed and after inter-  
394 digital webbing has begun to reduce. RNA was extracted from digits and their associated  
395 posterior inter-digital webbing following the dissection strategy shown in Figure 1 a of Wang *et*  
396 *al.*<sup>7</sup>. A summary of the taxonomic and tissue sampling strategy is presented in Extended Data  
397 Fig. 9. Investigators were not blinded to the group allocation during the experiment or when  
398 assessing outcomes.

399

400 ***Alligator mississippiensis***. Fertilized eggs were collected from six nests of wild individuals at the  
401 Rockefeller Wildlife Refuge in Grand Chenier, Louisiana (USA) in July 2015 by Dr. Ruth Elsey  
402 and colleagues. Eggs were marked with pencil to indicate the side that was facing upwards in the  
403 nest so that embryos would not be injured by rotation of during transfer. Eggs were transported to  
404 Yale University in mesh wire boxes containing original nesting material, and they were incubated  
405 in a temperature-controlled room at 32°C. Eggs were placed on a plastic rack, surrounded with  
406 original nesting material. Racks were suspended four inches above the bottom of a 10 gallon  
407 aquarium. The base of the aquarium was filled with three inches of water, which was heated to  
408 90°F with a submerged aquarium heater. The top of the tank was covered with plexiglass  
409 perforated with 1cm diameter holes to allow for airflow. Humidity within the tank was maintained  
410 at 90%.

411 Embryos were collected at Ferguson<sup>44</sup> st.18 and 19.5. The left and right limbs of ten  
412 individuals were dissected at each stage. For each stage, individuals sampled were of a single  
413 nest and, therefore, at least half-siblings<sup>45</sup>. Embryos were extracted under sterile, RNase-free  
414 conditions. Individual digits and the associated posterior interdigital webbing were dissected with  
415 fine scissors and forceps and placed immediately in room temperature RNeasy (Sigma-Aldrich).  
416 Digits were pooled into a single vial (n=20 digits) and divided into four samples of five randomly  
417 selected digits. RNA was extracted from each sample with TRIzol (Thermo Fisher Scientific)  
418 following described methods<sup>46</sup>. For digit D3 stage 18, two of the extractions yielded too little RNA  
419 for sequencing approach described below; therefore, there are only two replicates of this sample  
420 type. RNA quality was assessed using an Agilent Technologies 2100 Bioanalyzer, and samples  
421 with RIN scores above 8.5 were submitted for sequencing at the Yale Genome Sequencing  
422 Center. Sample size (three replicates per sample type) was selected for downstream differential  
423 expression analyses, according to References 27 and 28. To generate strand-specific  
424 polyadenylated RNA libraries, samples were processed as follows: Approximately 500 ng of RNA  
425 was purified with oligo-dT beads and the mRNA recovered was sheared by incubation at 94 C.  
426 First strand synthesis was performed with random primers, and then second strand synthesis was  
427 performed with dUTP to generate strand-specific libraries for sequencing. cDNA libraries were  
428 end-paired, A-tailed adapters were ligated, and the second strand was digested with Uricil-DNA-

429 Glycosylase. qRT-PCR was performed using a commercially available kit (KAPA Biosystems) to  
430 confirm library quality, and insert size distribution was determined with Agilent Bioanalyzer.  
431 Samples were multiplexed on an Illumina Hiseq 2000. Each sample was sequenced to a depth of  
432 approximately 50 million reads (single-stranded, 75 base pair length).

433 Reads were mapped to the American alligator genome assembly (allMis0.2) with genome  
434 assembly described by Green *et al.*<sup>47</sup>. Sequenced reads were mapped to the genome using  
435 Tophat2 v2.0.6 on Yale University's Ruddle computing cluster. In Tophat2, reads were first  
436 mapped to the transcriptome, and the remaining reads were then mapped to the genome.  
437 Mapped reads were assigned to genes with *HTSeq v0.5.3p*<sup>48</sup>, which was implemented with  
438 Python v2.7.2. In HTSeq, we required that reads be mapped to a specific strand, and to account  
439 for reads that mapped to more than one feature, we ran with the setting "intersection-nonempty."

440

441 ***Mus musculus***. Mice embryos (E13.5) were collected from a pregnant female of the strain  
442 C57BL/6J (Jackson Laboratories) in accordance with Yale IACUC #2015-11-483. The female was  
443 pregnant with nine embryos. Digits from the left and right forelimbs of each individual were  
444 dissected as described for alligator and pooled. From these 18 digits, RNA was extracted for  
445 three batches of five digits each. RNA extraction and sequencing methods are the same as  
446 described above for alligator, with the exception of sequencing depth (30 million reads were  
447 obtained for each mouse sample). Sequenced reads were mapped to the mouse genome  
448 assembly GRCm38 with Ensembl annotation v85 and the same Bowtie2 and HTSeq settings as  
449 described for alligator.

450

451 ***Anolis carolinensis***. Animals were bred according to published protocols<sup>49</sup> and in accordance  
452 with Loyola University's IACUC protocol #1992. Fertilized eggs were collected and transferred to  
453 petri dishes containing vermiculate moistened by equal mass water. Embryos were shipped to  
454 Yale University and incubated in a Digital Sportsman Incubator (No. 1502) at 26°C. Tissues were  
455 extracted and dissected according to methods described for alligator. Stage 10<sup>50</sup> embryos were  
456 sampled, and RNA was extracted using Qiagen RNeasy Micro Kit. RNA quality was assessed  
457 using with a BioAnalyzer. Samples with RIN scores above 9.0 were submitted for sequencing at  
458 the Yale Genome Sequencing Center. The RNAseq library was prepared with Clontech's Ultra  
459 Low V4 kit (cat# 634890). Each sample was sequenced to a depth of approximately 30 million  
460 reads (single-stranded, 75 base pair length). Sequenced reads were mapped to the *Anolis*  
461 genome assembly (AnoCar2.0, GCA\_000090745.1) with Ensembl annotation v85.

462

463 ***Gallus gallus***. Published transcriptomes of the digits of the fore- and hindlimbs of chicken<sup>7</sup>, were  
464 mapped to the newest chicken genome version (GalGal5.0) with Ensembl annotation v86  
465 following analytic methods described for alligator.

466

467 ***Homo sapiens***. Three individuals of Carnegie stage 18<sup>51</sup> were donated to Yale University's  
468 Medical School. The fore- and hindlimbs were sampled, and the anterior-most digit and its  
469 posterior interdigital webbing was dissected from the posterior digital plate. Dissections were  
470 performed and RNA was extracted and sequenced as previously described<sup>43</sup>. Limbs at this stage  
471 are similar to E12.5 of mouse<sup>52</sup>. Sequenced reads were mapped to the human genome assembly  
472 GRCh37 with Ensembl annotation v82 using the same Bowtie2 and HTSeq settings as described  
473 for alligator.

474

475 **Hierarchical clustering analysis.** To estimate relative mRNA abundance, we calculated  
476 transcripts per million (TPM)<sup>53</sup> for the genes of a given gene list (*i.e.*, full transcriptome,  
477 transcription factors, limb patterning genes, CDEGs). The TPM measurement standardizes for  
478 sequencing depth and transcript length. If multiple transcripts are described for a gene, then the  
479 median transcript length was used to calculate TPM; these lengths are available as a  
480 supplementary data file. TPM measures were normalized by a square root transformation, and  
481 hierarchical clustering was performed on the normalized TPM data with the R package  
482 “pvclust”<sup>54</sup>. Clusters were generated from the correlation-based dissimilarity matrix using the  
483 average-linked method. Adjusted uncertainty values were calculated from 1000 bootstrapping  
484 analysis.

485 If analyses involved comparisons between developmental stages or limbs, a bulk  
486 correction was performed with a mean transformation (*i.e.*, mean-centering)<sup>7</sup>. In these instances,  
487 Pearson's correlation coefficients range from [-1:1], rather than from [0:1]. Negative correlation  
488 values arise because after bulk correction, a gene's expression values is negative for samples  
489 with a sqrt(TPM) value less than the mean sqrt(TPM) value of that gene among all samples of the  
490 bulk. Bulks were comprised of all samples from a particular stage or all samples of a particular  
491 limb.

492

493 **Principal component analyses.** PCA were performed using the “prcomp” function in R for  
494 various gene lists using square root TPMs as normalized measures of relative mRNA abundance.  
495 As with HCA, if analyses included samples from multiple stages or from different types of limbs, a  
496 bulk correction was performed with a mean transformation (*i.e.*, mean-centering). Bulks were  
497 comprised of all samples from a particular stage or all samples of a particular limb. Loading  
498 values for samples in PCAs and also bootstrap values, which were calculated using the with the  
499 “bootPCA” function of the bootSVD package<sup>55</sup> with centerSamples=True and 1000 bootstrap  
500 samples), are provided as a supplementary data file.

501

502 **Differential expression testing of adjacent digits.** EdgeR (Release 3.1)<sup>27,28</sup> was used to test  
503 for differential expression of adjacent digits (e.g., D1 vs. D2) of mouse, alligator, *Anolis* and  
504 chicken. We used function glmFit and glmLRT in EdgeR, which implemented a generalized  
505 regression model for differential expression test. Specifically, in alligator and chicken PCA and  
506 PCA revealed stable grouping of samples by digit number across stages. Therefore, subsequent  
507 analyses consider these data from two stages simultaneously.

508 In *Anolis*, pairwise testing of samples revealed nonconventional  $p$  value distribution, with  
509 a decrease near zero and sometimes a bump near 0.5. Because correlation between replicates  
510 was lower than what was observed in either mouse or alligator (Extended Data Fig. 7), and  
511 because PCA of the full transcriptomes revealed two major clusters of data that did not  
512 correspond to biological phenomena (Extended Data Fig. 1 c), we corrected for the artifact of the  
513 non-biological clusters by including the first principle component in the regression model in  
514 EdgeR. Analyses were also run without this PC1 correction. Results presented in the manuscript  
515 are robust to both analytic approaches, although PC1 correction results in discovery of slightly  
516 more differentially expressed genes for a given false discovery rate. (e.g., compare Fig. 3 and  
517 Extended Data Fig. 10).

518 Following analyses of differential expression, multiple hypothesis testing was accounted  
519 for by adjusting  $p$  values following the Benjamini-Hochberg method<sup>26</sup>. We also considered a  
520 second correction method, the  $q$ -value of Storey<sup>56</sup>. The major results presented in the study are  
521 robust to both methods. Although the Storey method uniformly called more genes as significant at  
522 the FDR threshold of 0.05, the same genes are recovered in the center of Venn diagrams (Fig. 3,  
523 Fig 4a, Fig 5 b).

524

### 525 **Comparing correlation of fold change between orthologs and random genes.**

526 To assess whether genes differentially expressed at a given position in one species are behaving  
527 similarly in other species, we compared the relative fold change of these genes to random genes  
528 of similar expression level in the other species. For example, between D1 and D2 of alligator 46  
529 genes are recovered as differentially expressed among the one-to-one orthologs of the three  
530 pentadactyl species sampled (FDR threshold of 0.05) (Fig. 3). For these genes, we calculated the  
531 fold change in TPM according to the equation in Fig. 4 b for all three species (e.g., mouse,  
532 alligator and *Anolis*). Next, for each of the 46 genes, we identified the gene most similar in its  
533 TPM value at the position of the anterior digit (e.g., for the comparisons of D1 vs D2, we matched  
534 the TPM of D1) among the one-to-one orthologous transcription factor genes for the two other  
535 species. Then, we calculated to Pearson's correlation for the vector comprised the gene fold  
536 changes from the original species (alligator) and the orthologs of the other species (mouse and  
537 *Anolis*). We also calculated Pearson's correlation between gene fold changes from the original  
538 species (alligator) and the random list of random genes of similar expression level for each of the

539 other species. This was repeated for each the three species, and if a limb was sampled at  
540 multiple time points, for each time point. Finally, to assess whether at a given position  
541 orthologous genes could be distinguished in their behavior to random genes, we compared the  
542 means of these correlations using two tests: t-test and a Mann-Whitney U test.

543

544 **Differential expression testing between all digits.** EdgeR was also used to test for genes that  
545 differed between any combination of digits within a limb. This was done by specifying multiple  
546 coefficients to function glmLRT. As with the pairwise tests, we considered both stages of alligator  
547 and chicken simultaneously and included the first principle component in the regression model for  
548 *Anolis*. Genes identified as CDEGs for each species are available as supplemental information.

549

550 **Transcription factors.** To identify transcription factor genes, we utilized a published atlas of  
551 human and mouse transcription factors<sup>25</sup>. The published Entrez gene IDs were matched with  
552 human Ensembl gene IDs in Ensembl assembly v85 using BioMart (N=2183). To recover the  
553 species-specific lists of transcription factors, two approaches were taken. In mouse and *Anolis*,  
554 orthologous genes were identified using BioMart's orthology predictions for Ensembl assembly  
555 v85. In alligator and chicken, because these species were analyzed using different assembly  
556 builds, orthology was determined by matching gene symbols to those of human from Ensembl  
557 assembly v85. By this approach, we recovered transcription factors for each species as follows:  
558 1838 in mouse, 1563 in *Anolis*, 1455 in Alligator, and 1217 in chicken. To identify human  
559 orthologs of select genes identified by differential expression analyses, we first used gene  
560 symbols and then confirmed that the ensemble IDs were consistent across Ensembl  
561 assemblies. Genes identified as transcription factors for each species are available as  
562 supplemental information.

563 To identify one-to-one orthologous transcription factor genes in mouse, alligator, and  
564 *Anolis*, we used BioMart to generate a list of one-to-one orthologous genes between mouse and  
565 *Anolis* in Ensembl assembly v85 that correspond to the published transcription factor Entrez  
566 IDs<sup>31</sup>. This gene list was then matched to alligator and chicken by gene symbol to recover  
567 transcription factor genes that are one-to-one orthologs in multiple species.

568

569 **Limb patterning genes.** A Ph.D. dissertation by Carkett<sup>24</sup> identified genes that are sensitive to  
570 *Shh* signaling by experimental perturbations and *in silico* analyses. From these studies, a  
571 summary list of genes that pattern the autopod was produced (pg. 172). This gene list includes  
572 transcription factor and signaling genes. These gene symbols were matched with each species to  
573 identify the subset of genes present in the genome assemblies that we considered for mouse  
574 (n=151), alligator (n=142), *Anolis* (n=140), and chicken (n=136). Genes identified as limb  
575 patterning genes for each species are available as supplemental information.



576

577

578 ***In situ* hybridization.** RNA from a stage 18 alligator limb was extracted, as described above for  
579 sequencing, and cDNA was generated with the High Capacity cDNA Reverse Transcription kit  
580 (Applied Biosystems). Primers were designed with Primer3<sup>57</sup> to amplify fragments of *Tbx2*  
581 (forward, GACCTTGGGCCTTCTCCTAC; reverse, GGGAGTTGTTTGGGGTTTT), *Tbx3* (forward,  
582 ACCAGGGGTGGATGAACATA; reverse, GCCCTAAAGCAGAGACATGC), and *Sall1* (forward,  
583 CTCACAGCTCAACAACCCAC; reverse, AAACCACCAGCCTCTACCTC). PCR products were  
584 purified with the QIAquick Gel Extraction kit (Qiagen) and cloned with the Topo TA cloning kit  
585 (Invitrogen) into the pCR 4-TOPO vector. Vectors were transformed into DH5 $\alpha$ -T1 competent  
586 cells. Sense and antisense probes were prepared by linearizing plasmid with the restriction  
587 endonucleases *Not1* or *Pme1* and then transcribing the linearized product with T7 or T3  
588 polymerase, respectively. Probes are labeled with digoxigenin (Sigma-Aldrich) and hybridized  
589 with the alligator embryos at 68°C. Methods for *in situ* hybridization followed GEISHA Project  
590 miRNA Detection Protocol Version 1.1 (<http://geisha.arizona.edu/>).

591

592 **Illustrations.** The authors modified existing images of the mouse forelimb skeleton<sup>58</sup>, alligator  
593 forelimb skeleton<sup>59</sup>, chicken limb skeleton<sup>22</sup>, and chicken and alligator silhouettes<sup>22</sup>. *Anolis*  
594 silhouette by Sarah Werning.

595 **References**

- 596 1 Coates, M. & Clack, J. Polydactyly in the earliest known tetrapod limbs. *Nature* **347**, 66-  
597 69 (1990).
- 598 2 Lebedev, O. A. & Coates, M. I. The postcranial skeleton of the Devonian tetrapod  
599 *Tulerpeton curtum* Lebedev. *Zoological Journal of the Linnean Society* **114**, 307-348,  
600 doi:10.1111/j.1096-3642.1995.tb00119.x (1995).
- 601 3 Owen, R. *On the nature of limbs*. 132 (John Van Voorst, 1849).
- 602 4 Coates, M. Ancestors and homology. *Acta Biotheoretica* **41**, 411-424,  
603 doi:10.1007/BF00709374 (1993).
- 604 5 Tabin, C. J. Why we have (only) five fingers per hand: hox genes and the evolution of  
605 paired limbs. *Development* **116**, 289-296 (1992).
- 606 6 Zhu, J. & Mackem, S. John Saunders' ZPA, Sonic hedgehog and digit identity – How  
607 does it really all work? *Developmental Biology* **429**, 391-400,  
608 doi:<http://dx.doi.org/10.1016/j.ydbio.2017.02.001> (2017).
- 609 7 Wang, Z., Young, R. L., Xue, H. & Wagner, G. P. Transcriptomic analysis of avian digits  
610 reveals conserved and derived digit identities in birds. *Nature* **477**, 583–586,  
611 doi:10.1038/nature10391 (2011).
- 612 8 Montavon, T., Garrec, J.-F. L., Kerzberg, M. & Duboule, D. Modelling HOX genes  
613 regulation in digits: reverse collinearity and the molecular origin of thumbness. *Genes*  
614 *Dev* **22**, 346-359, doi:10.1101/gad.1631708 (2008).
- 615 9 Chiang, C. *et al.* Manifestation of the Limb Prepattern: Limb Development in the Absence  
616 of Sonic Hedgehog Function. *Developmental Biology* **236**, 421-435,  
617 doi:<http://dx.doi.org/10.1006/dbio.2001.0346> (2001).
- 618 10 Harfe, B. D. *et al.* Evidence for an expansion-based temporal Shh gradient in specifying  
619 vertebrate digit identities. *Cell* **118**, 517-528, doi:10.1016/j.cell.2004.07.024 (2004).
- 620 11 Scherz, P. J., McGlenn, E., Nissim, S. & Tabin, C. J. Extended exposure to sonic  
621 hedgehog is required for patterning the posterior digits of the vertebrate limb. *Dev Biol*  
622 **308**, 343-354, doi:10.1016/j.ydbio.2007.05.030 (2007).
- 623 12 Reno, P. L. *et al.* Patterns of correlation and covariation of anthropoid distal forelimb  
624 segments correspond to Hoxd expression territories. *Journal of Experimental Zoology*  
625 *Part B: Molecular and Developmental Evolution* **310B**, 240-258, doi:10.1002/jez.b.21207  
626 (2008).
- 627 13 Dahn, R. D. & Fallon, J. F. Interdigital regulation of digit identity and homeotic  
628 transformation by modulated BMP signaling. *Science* **289**, 438-441,  
629 doi:10.1126/science.289.5478.438 (2000).
- 630 14 Suzuki, T., Hasso, S. M. & Fallon, J. F. Unique SMAD1/5/8 activity at the phalanx –  
631 forming region determines digit identity. *Proc Natl Acad Sci U S A* **105**, 4185-4190  
632 doi:10.1073/pnas.0707899105 (2008).
- 633 15 Suzuki, T., Takeuchi, J., Koshiba-Takeuchi, K. & Ogura, T. Tbx Genes Specify Posterior  
634 Digit Identity through Shh and BMP Signaling. *Developmental Cell* **6**, 43-53,  
635 doi:[http://dx.doi.org/10.1016/S1534-5807\(03\)00401-5](http://dx.doi.org/10.1016/S1534-5807(03)00401-5) (2004).
- 636 16 Wagner, G. P. & Gauthier, J. A. 1,2,3=2,3,4: A solution to the problem of the homology  
637 of the digits in the avian hand. *Proc Natl Acad Sci USA* **96**, 5111-5116, doi:10.1073/  
638 pnas.96.9.5111 (1999).
- 639 17 Larsson, H. C. E. & Wagner, G. P. Pentadactyl ground state of the avian wing. *Journal of*  
640 *Experimental Zoology* **294**, 146-151, doi:10.1002/jez.10153 (2002).
- 641 18 Feduccia, A. & Nowicki, J. The hand of birds revealed by early ostrich embryos.  
642 *Naturwissenschaften* **89**, 391-393 (2002).
- 643 19 KunderáT, M., Seichert, V., Russell, A. P. & Smetana, K. Pentadactyl pattern of the avian  
644 wing autopodium and pyramid reduction hypothesis. *Journal of Experimental Zoology*  
645 **294**, 152-159, doi:10.1002/jez.10140 (2002).
- 646 20 Burke, A. C. & Feduccia, A. Developmental Patterns and the Identification of  
647 Homologies in the Avian Hand. *Science* **278**, 666-668, doi:10.1126/  
science.278.5338.666 (1997).

- 648 21 Welten, M. C. M., Verbeek, F. J., Meijer, A. H. & Richardson, M. K. Gene expression and  
649 digit homology in the chicken embryo wing. *Evolution & Development* **7**, 18-28,  
650 doi:10.1111/j.1525-142X.2005.05003.x (2005).
- 651 22 de Bakker, M. A. G. *et al.* Digit loss in archosaur evolution and the interplay between  
652 selection and constraints. *Nature* **500**, 445-448, doi:10.1038/nature12336  
653 <http://www.nature.com/nature/journal/v500/n7463/abs/nature12336.html> - supplementary-  
654 information (2013).
- 655 23 Vargas, A. & Fallon, J. F. Birds have dinosaur wings: the molecular evidence. *J Exp*  
656 *Zool B Mol Dev Evol* **304**, 86-90, doi:10.1002/jez.b.21023 (2005).
- 657 24 Carkett, M. D. *Comparative analysis of Sonic Hedgehog signalling and the response to*  
658 *Sonic Hedgehog signalling in vertebrate forelimbs and hindlimbs*. PhD thesis, University  
659 College London, (2015).
- 660 25 Ravasi, T. *et al.* An Atlas of Combinatorial Transcriptional Regulation in Mouse and Man.  
661 *Cell* **140**, 744-752, doi:<http://dx.doi.org/10.1016/j.cell.2010.01.044> (2010).
- 662 26 Benjamini, Y. & Hochberg, Y. Controlling the False Discovery Rate: A Practical and  
663 Powerful Approach to Multiple Testing. *Journal of the Royal Statistical Society. Series B*  
664 *(Methodological)* **57**, 289-300, doi:citeulike-article-id:1042553  
665 doi: 10.2307/2346101 (1995).
- 666 27 Robinson, M. D., McCarthy, D. J. & Smyth, G. K. edgeR: a Bioconductor package for  
667 differential expression analysis of digital gene expression data. *Bioinformatics (Oxford,*  
668 *England)* **26**, 139-40, doi:10.1093/bioinformatics/btp616 (2010).
- 669 28 McCarthy, J. D., Chen, Y. & Smyth, G. K. Differential expression analysis of multifactor  
670 RNA-Seq experiments with respect to biological variation. *Nucleic Acids Research* **40**, 9  
671 (2012).
- 672 29 Warren, W. C. *et al.* A New Chicken Genome Assembly Provides Insight into Avian  
673 Genome Structure. *G3: Genes|Genomes|Genetics* **7**, 109 (2017).
- 674 30 Towers, M., Signolet, J., Sherman, A., Sang, H. & Tickle, C. Insights into bird wing  
675 evolution and digit specification from polarizing region fate maps. *Nat Commun* **2**, 1-7,  
676 doi:10.1038/ncomms1437 (2011).
- 677 31 Newman, S. A. & Frisch, H. L. Dynamics of skeletal pattern formation in developing chick  
678 limb. *Science* **205**, 662-668 (1979).
- 679 32 Raspopovic, J., Marcon, L., Russo, L. & Sharpe, J. Digit patterning is controlled by a  
680 Bmp-Sox9-Wnt Turing network modulated by morphogen gradients. *Science* **345**,  
681 566-570, doi:10.1126/science.1252960 (2014).
- 682 33 Wagner, G. P. *Homology, Genes and Evolutionary Innovation*. (University Press, 2014).
- 683 34 Bateson, W. *Problems of Genetics*. (Oxford University Press, 1913).
- 684 35 Stewart, T. A. The origin of a new fin skeleton through tinkering. *Biol. Letts* **11**, 1-5,  
685 doi:10.1098/rsbl.2015.0415 (2015).
- 686 36 Salinas-Saavedra, M. *et al.* New developmental evidence supports a homeotic frameshift  
687 of digit identity in the evolution of the bird wing. *Frontiers in Zoology* **11**, 33, 1-10,  
688 doi:10.1186/1742-9994-11-33 (2014).
- 689 37 Yoon, S. & Nam, D. Gene dispersion is the key determinant of the read count bias in  
690 differential expression analysis of RNA-seq data. *BMC Genomics* **18**, 408,  
691 doi:10.1186/s12864-017-3809-0 (2017).
- 692 38 Rose, K. D. *The beginning of the age of mammals*. 431 (The Johns Hopkins University  
693 Press, 2006).
- 694 39 Carroll, R. *Vertebrate Paleontology and Evolution* (Freeman, 1988).
- 695 40 Xu, X. & Mackem, S. Tracing the evolution of Avian Wing Digits. *Curr Biol* **23**, R538-  
696 R544, doi:10.1016/j.cub.2013.04.071 (2013).
- 697 41 Xu, X. *et al.* A Jurassic ceratosaur from China helps clarify avian digital homologies.  
698 *Nature* **459**, 940-944, doi:10.1038/nature08124  
699 <https://www.nature.com/articles/nature08124> - supplementary-information (2009).
- 700 42 Vargas, A., Wagner, G. & Gauthier, J. Limusaurus and bird digit identity. *Nature*  
701 *Proceedings* **713** (2009).
- 702 43 Belon, P. *L'histoire de la natvre des oyseavx : avec levr descriptions, & naïfs portraits*  
703 *retirez du natvrel, escrite en sept livres*. (... Gilles Corrozet ... 1555).

- 704 44 Ferguson, M. W. J. in *Biology of the Reptilia* Vol. 14 (ed Carl Gans) Ch. 5, 329-481  
705 (1985).
- 706 45 Davis, L. M., Glenn, T. C., Elsey, R. M., Dessauer, H. C. & Sawyer, R. H. Multiple  
707 paternity and mating patterns in the American alligator, *Alligator mississippiensis*.  
708 *Molecular Ecology* **10**, 1011-1024, doi:10.1046/j.1365-294X.2001.01241.x (2001).
- 709 46 Chomczynski, P. & Mackey, K. Short Technical Report - Modification of the TRIZOL  
710 reagent procedure for isolation of RNA from Polysaccharaide and proteoglycan rich  
711 sources. *Biotechniques* **19**, 942-945 (1995).
- 712 47 Green, R. E. *et al.* Three crocodylian genomes reveal ancestral patterns of evolution  
713 among archosaurs. *Science* **346**, doi:10.1126/science.1254449 (2014).
- 714 48 Anders, S., Pyl, P. T. & Huber, W. HTSeq - A Python framework to work with high-  
715 throughput sequencing data. *Bioinformatics*, doi:10.1093/bioinformatics/btu638  
716 (2014).
- 717 49 Sanger, T. J., Hime, P. M., Johnson, M. A., Diani, J. & Lsos, J. B. Laboratory protocols  
718 for husbandry and embryo collection of *Anolis* lizards. *Herpetological Review* **39**, 58-63  
719 (2008).
- 720 50 Sanger, T., Losos, J. & Gibson-Brown, J. A developmental staging series for the lizard  
721 genus *Anolis*: a reptilian model system for the integration of evolution, development, and  
722 ecology. *J. Morph.* **269**, 129-137 (2008).
- 723 51 O'Rahilly, R. Early human development and the chief sources of information on staged  
724 human embryos. *Europ. J. Obstet. Gynec. Reprod. Biol.* **9**, 273-280 (1979).
- 725 52 Cotney, J. *et al.* The Evolution of Lineage-Specific Regulatory Activities in the Human  
726 Embryonic Limb. *Cell* **154**, 185-196, doi:<http://dx.doi.org/10.1016/j.cell.2013.05.056>  
727 (2013).
- 728 53 Wagner, G. P., Kin, K. & Lynch, V. J. Measurement of mRNA abundance using RNA-seq  
729 data: RPKM measure is inconsistent among samples. *Theory in Biosciences* **131**, 281-  
730 285, doi:10.1007/s12064-012-0162-3 (2012).
- 731 54 Suzuki, R. & Shimodaira, H. PvcLust: an R package for assessing the uncertainty in  
732 hierarchical clustering. *Bioinformatics* **22**, 1540-1542, doi:10.1093/bioinformatics/btl117  
733 (2006).
- 734 55 Fisher, A., Caffo, B., Schwartz, B. & Zipunnikov, V. Fast, Exact Bootstrap Principal  
735 Component Analysis for  $p > 1$  million. *Journal of the American Statistical Association* **111**,  
736 846-860, doi:10.1080/01621459.2015.1062383 (2016).
- 737 56 Storey, J. D. The positive false discovery rate: a Bayesian interpretation and the q-value.  
738 *Ann. Statist.* **31**, 2013-2035, doi:10.1214/aos/1074290335 (2003).
- 739 57 Untergasser, A. *et al.* Primer3 - new capabilities and interfaces. *Nucleic Acids Research*  
740 **40**, e115 (2012).
- 741 58 Krebs, O. *et al.* Replicated anterior zeugopod (raz): a polydactylous mouse mutant with  
742 lowered Shh signaling in the limb bud. *Development* **130**, 6037-6047,  
743 doi:10.1242/dev.00861 (2003).
- 744 59 Muller, G. B. & Alberch, P. Ontogeny of the Limb Skeleton in Alligator mississippiensis:  
745 Developmental Invariance and Change in the Evolution of Archosaur Limbs *Journal of*  
746 *Morphology* **203**, 151-164 (1990).
- 747

748 **Data availability**

749 The RNA-sequencing data for mouse, alligator and *Anolis* (including counts of mapped reads), is  
750 available on Gene Expression Omnibus (GEO) repository (<https://www.ncbi.nlm.nih.gov/geo/>)  
751 under accession number GSE108337. Sequencing data for human limb samples is available  
752 through the database of Genotypes and Phenotypes (dbGaP) under study accession number  
753 phs001226.v1.p1. Supplementary data files include (1) unique gene IDs corresponding to all  
754 gene lists described, (2) median gene lengths, (3) bootstrap values for all PCA plots, (4) mapped  
755 reads for chicken. All code used for analyses is available on GitHub  
756 ([https://github.com/ThomasAStewart/digit\\_identity\\_project](https://github.com/ThomasAStewart/digit_identity_project)) and available upon request.

757

758 **Acknowledgements**

759 We thank the Wagner lab members and SE Newman for discussions on data interpretation. The  
760 human embryonic material was provided by the Joint MRC (G0700089)/Wellcome Trust  
761 (GR082557) Human Developmental Biology Resource. Work in the Wagner lab was supported by  
762 the John Templeton Foundation (Integrating Generic and Genetic Explanations of Biological  
763 Phenomena; ID 46919), by National Institutes of Health grant GM094780 (to J.P.N.), and by  
764 National Science Foundation grant 1353691.

765

766 **Author Contributions**

767 T.A.S. and G.P.W. contributed project design and paper writing. T.A.S., T.J.S., J.L.C., and J.P.N.  
768 contributed data for analysis. T.A.S., C.L., and G.P.W. contributed analyses of data.  
769 Correspondence and requests for materials should be addressed to [tomstewart@uchicago.edu](mailto:tomstewart@uchicago.edu)  
770 and [gunter.wagner@yale.edu](mailto:gunter.wagner@yale.edu)

771

772 **Additional Information**

773 Extended Data accompanies this paper.

774 Competing Financial Interests: The authors declare no competing financial interests.

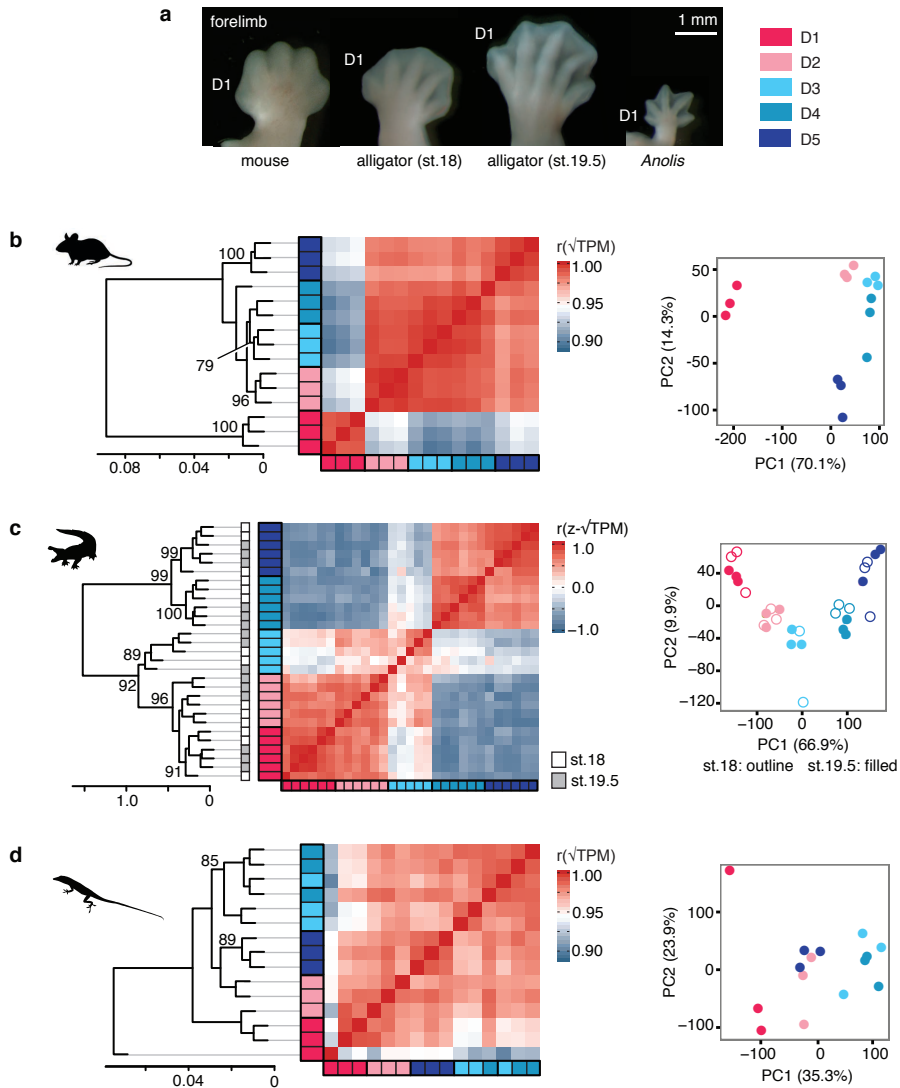

**Figure 1 | Pentadactyl amniote limbs have disparate patterns of genetic differentiation of digits.** (a) Photographs of right forelimbs at the stages sampled, dorsal perspective. Analyses of limb patterning genes show that in (b) mouse and (c) alligator, replicates of each digit form clusters, indicating that the digits have distinct gene expression profiles. By contrast, (c) *Anolis* digits do not show clear differentiation of gene expression profiles.

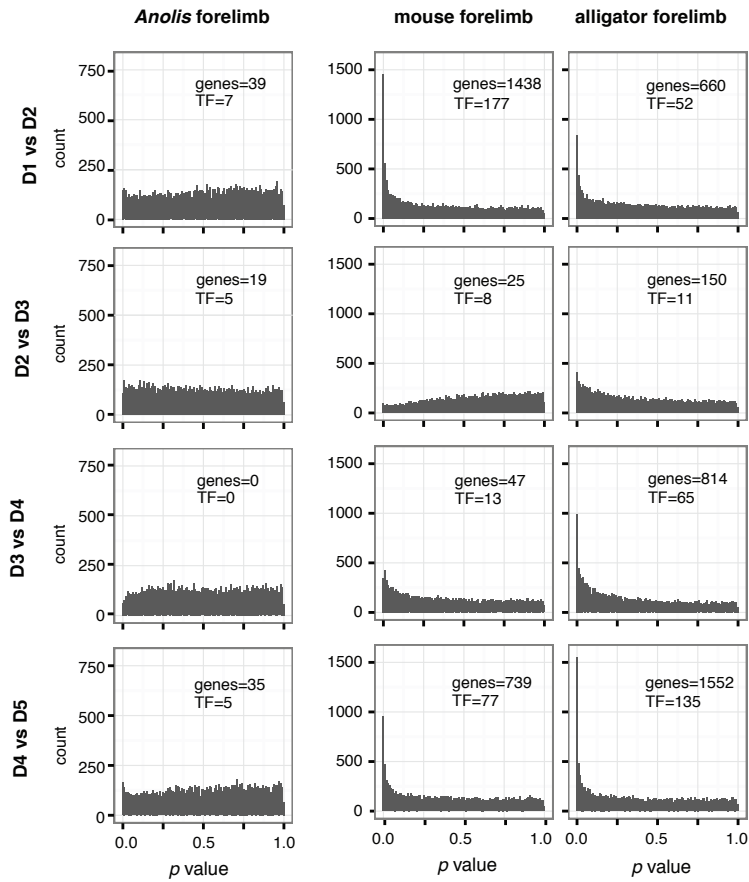

**Figure 2 | Differential expression analyses suggest homogeneity among *Anolis* digits.** Histograms show the distribution of  $p$  values from expression analyses of adjacent digits. In *Anolis*,  $p$  value distributions that are close to uniform, indicating very weak genetic differentiation of adjacent fingers. Mouse and alligator, on the other hand, generally show strongly biased  $p$  value distributions. The number of genes that are identified as differentially expressed at a FDR threshold of 0.05 are noted in each panel as “genes,” and the number of transcription factors among these are noted in each panel as “TF.”

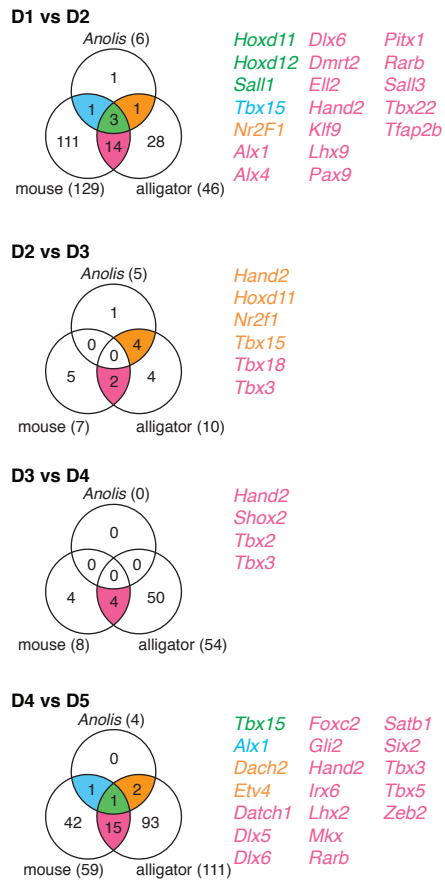

**Figure 3 | Few genes are differentially expressed at the same position between pentadactyl limbs.** Venn diagrams of one-to-one orthologous transcription factors genes for mouse, alligator, and *Anolis* that were identified as differentially expressed between adjacent digits with a FDR threshold of 0.05.



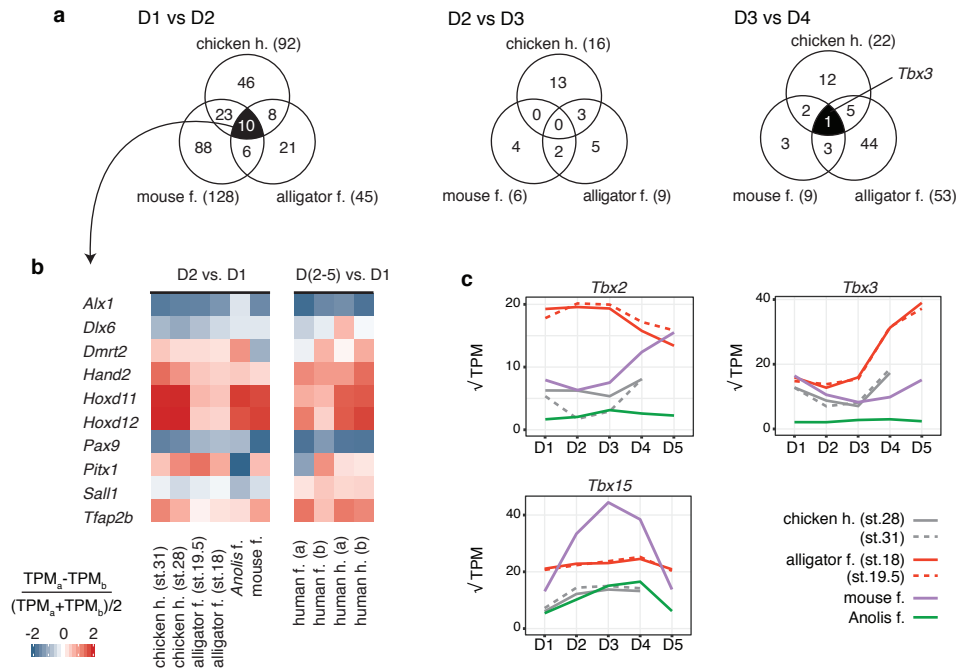

**Figure 4 | D1 has a unique, conserved gene expression profile across amniotes.** (a) Venn diagrams of one-to-one orthologous transcription factors genes of mouse, alligator, and chicken that are differentially expressed between adjacent digits (FDR threshold of 0.05). (b) Heatmap showing relative expression of genes in D2 and D1. Human transcriptomic data provides additional support for the hypothesis that D1 has a conserved developmental identity across amniotes. (c) Expression levels of *T-box* family genes across the autopod. Transcript per million (TPM) values presented in panels b and c calculated from the gene list of one-to-one orthologous genes between mouse, alligator, *Anolis*, chicken, and human.

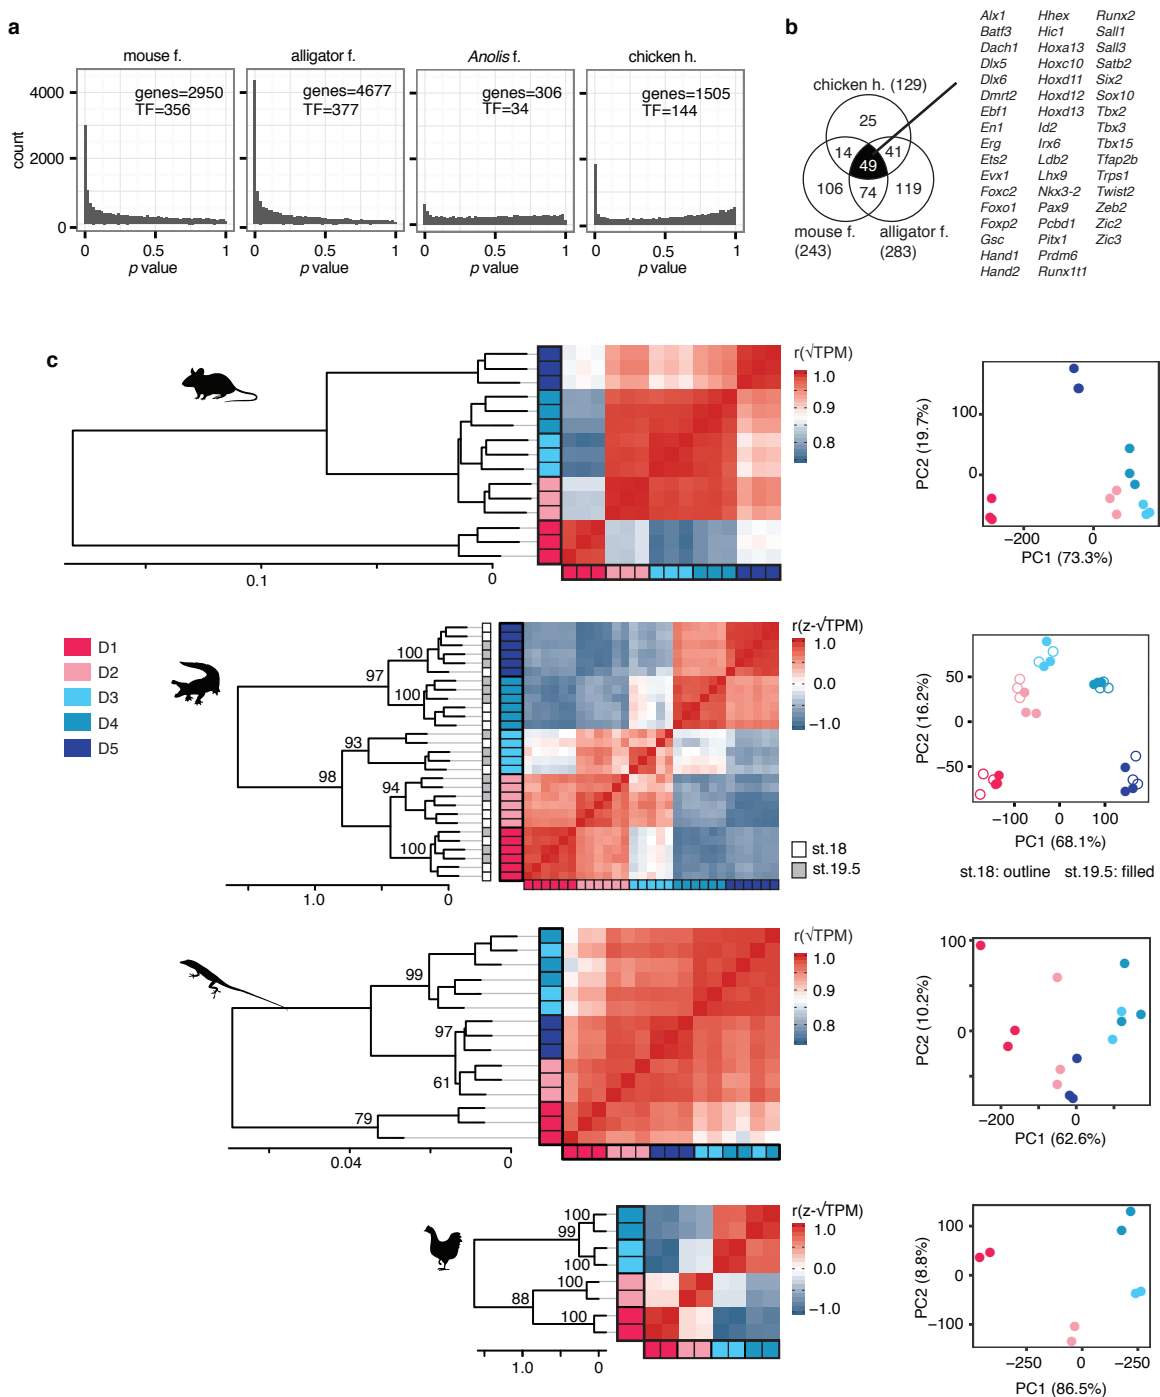

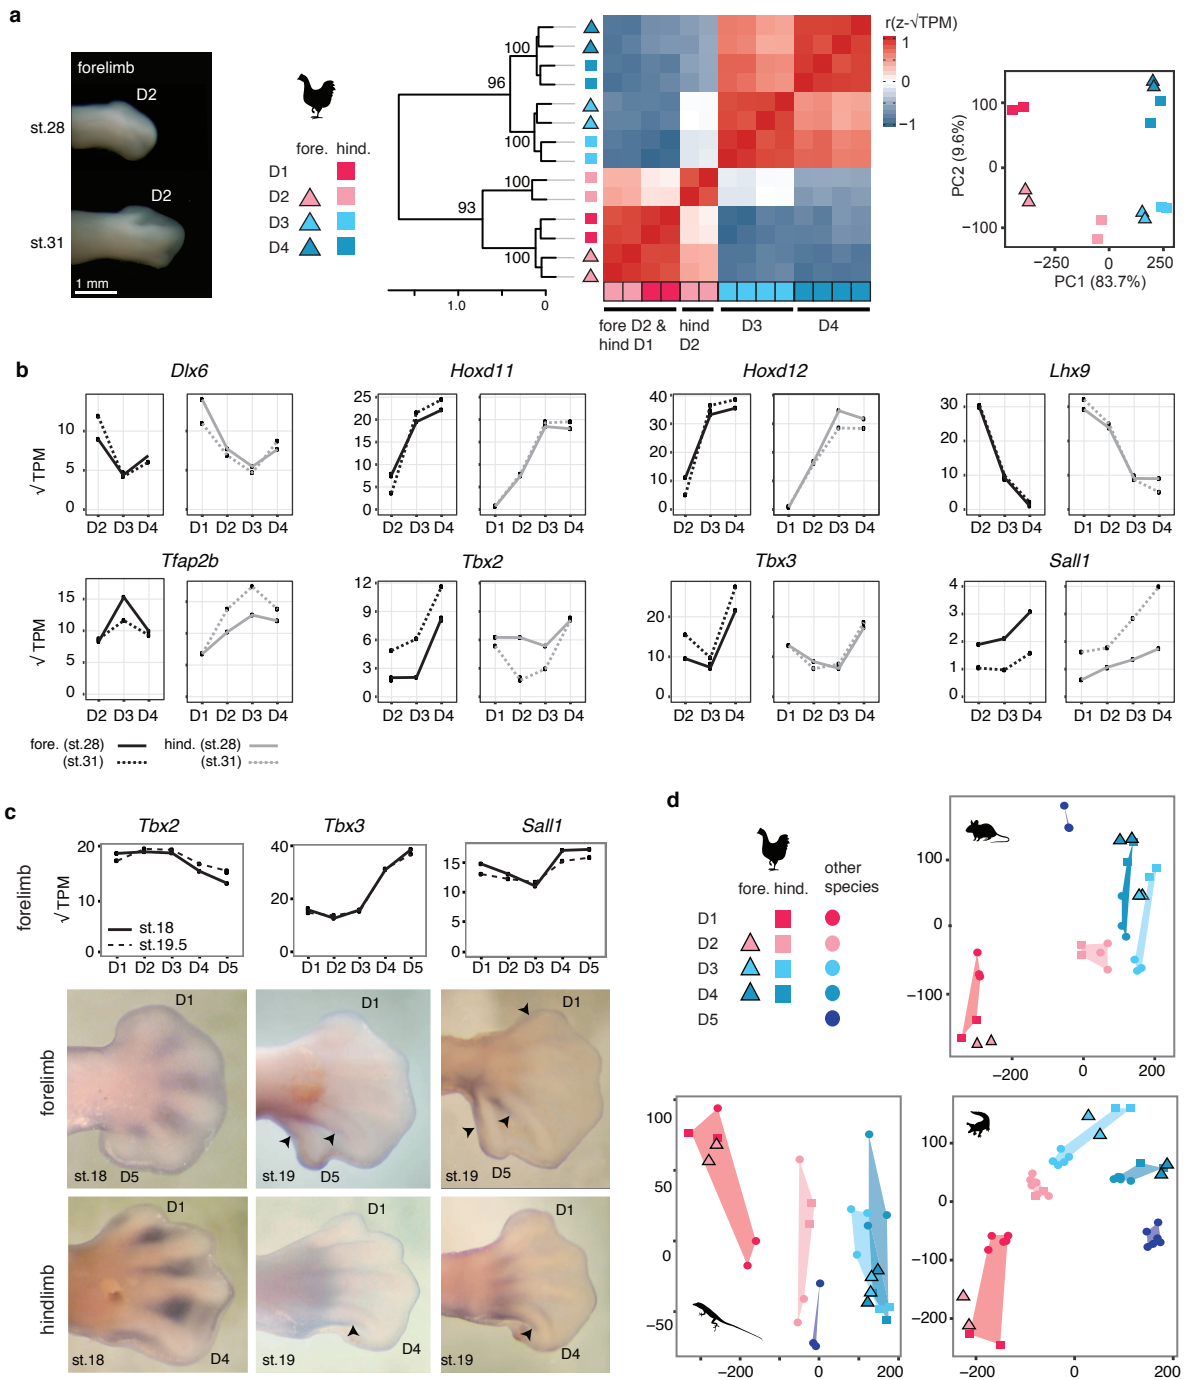

**Figure 6 | Digits D2, D3, D4 of the chicken forelimb correspond to D1, D3, and D4 of other limbs.** This pattern is observed by (a) HCA and PCA of CDEGs for digits of chicken wing and hindlimb. (b) Expression levels of individual transcription factor genes in chicken. (c) *In situ* hybridization of alligator embryos confirms that the position of differential expression of transcription factors can be conserved between fore- and hindlimbs that differ in digit number. Arrowheads indicate distal-most expression along a developing digit. (d) Projection of chicken digit data upon PCA of CDEGs for mouse, alligator, and *Anolis*. TPM values shown in panels b and c calculated from the gene list of one-to-one orthologous genes between mouse, alligator, *Anolis*, chicken, and human.

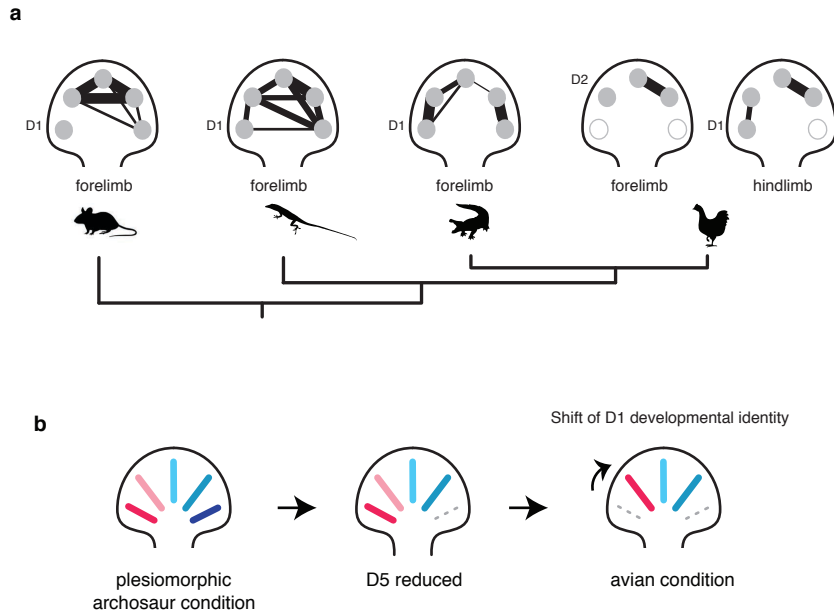

**Figure 7 | The evolution of digit gene expression in amniotes is highly dynamic.** (a) A phylogeny of the taxa sampled by this study and schematic graphs summarizing the relative similarity of digits within limbs, where connections and line thickness reflect degree of similarity in gene expression profiles. (b) Schematic of a limited frame shift model for evolutionary origin of the avian wing in which the developmental identity of D1 was translocated to position D2.

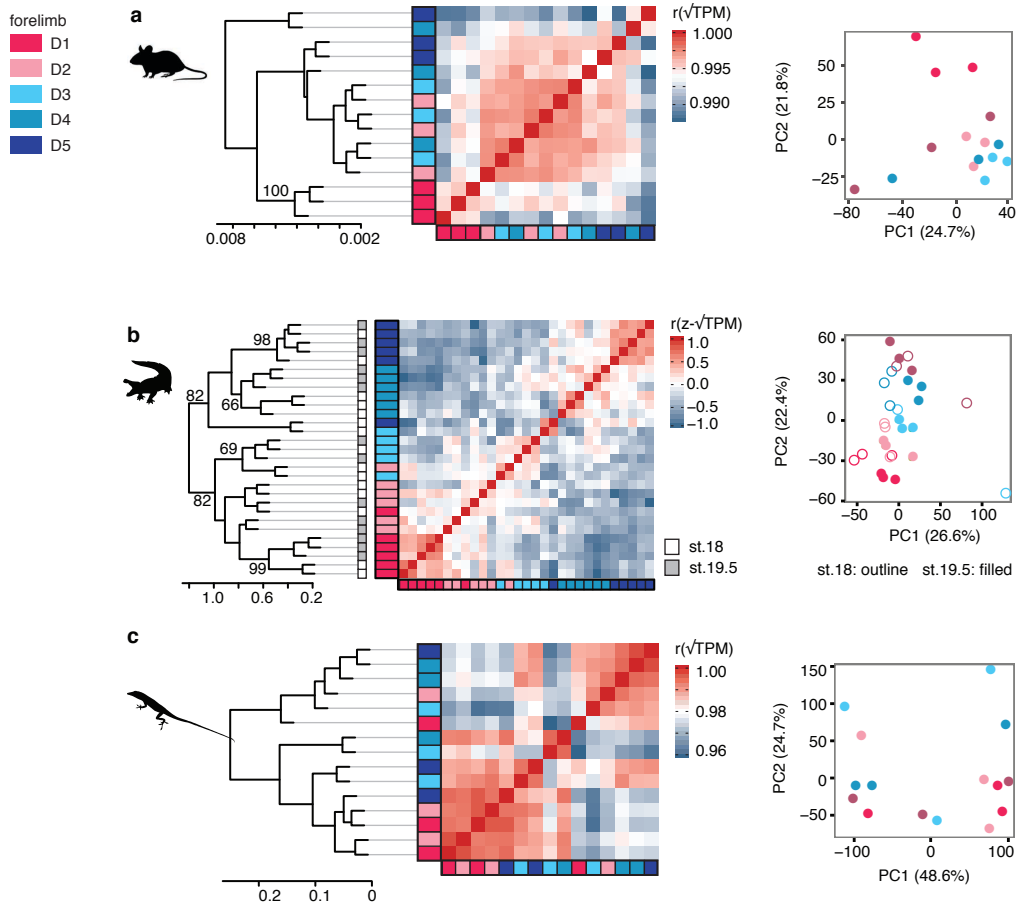

**Extended Data Figure 1 | Analyses of full transcriptomes do not show clustering of samples by digit.** (a) In mouse, only D1 forms a cluster in HCA, indicating that similarity can be diagnosed when the expression of all genes is considered; more-posterior digits do not form clusters of replicates. (b) In alligator, a cluster with low bootstrap support is observed for D4 samples. Stage 18 and stage 19.5 samples are differentiated as filled or outlined points in PCA plot. (c) In *Anolis*, samples do not reveal stable clustering of digit replicates.

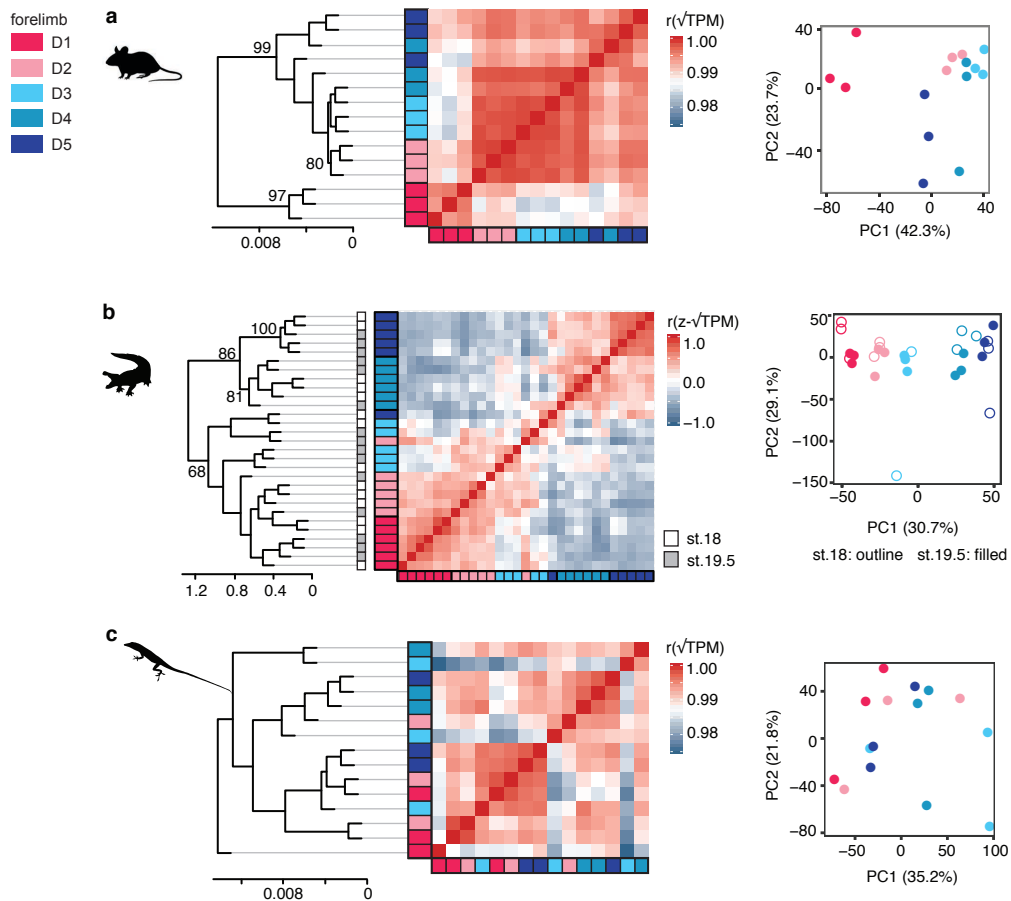

**Extended Data Figure 2 | Analyses of all transcription factors show patterns of sample clustering consistent with analyses of limb patterning genes.** (a) In mouse, D1 is markedly distinct from the posterior digits. (b) In alligator, two major clusters of digits are observed: (D1, D2, D3)(D4, D5). Stage 18 and stage 19.5 samples are differentiated as filled or outlined points in PCA plot. (c) In *Anolis*, digits do not show gene expression differentiation when all transcription factors are considered. Broadly, adjusted uncertainty values recovered by HCA are lower for a given cluster (e.g., alligator D4) than when limb patterning genes are analyzed.

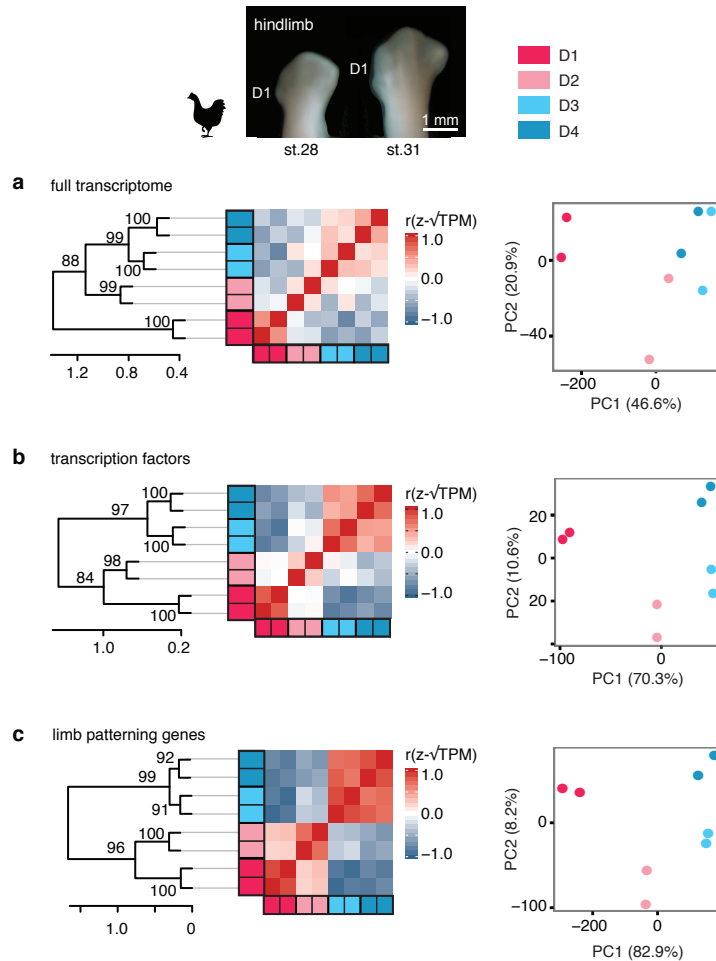

**Extended Data Figure 3 | Clustering analyses of chicken hindlimb digit transcriptomes.** PCA, heatmap of Pearson's correlations and HCA of (a) the full transcriptome and (b) transcription factor genes, (c) and known limb patterning genes. Each digit is represented by two data points, which correspond to one sample from stage 28 and another from stage 31. Clustering analyses show stable gene expression profiles for individual digits over this developmental window, even after phalangeal number has been established.

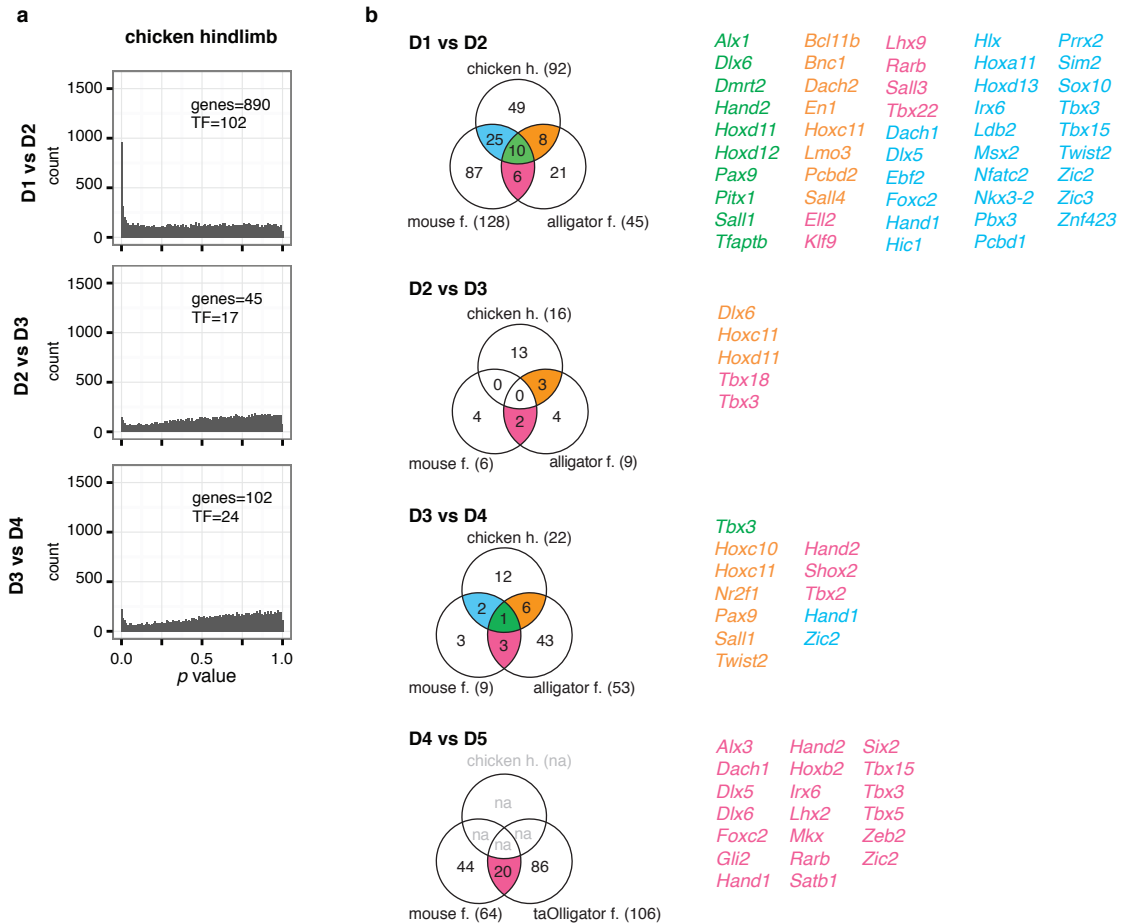

**Extended Data Figure 4 | Differential expression analyses of adjacent chicken hindlimb digits.** (a) *p* value distributions for pairwise tests of differential expression. The number of genes that are identified as differentially expressed at a FDR threshold of 0.05 are noted in each panel as “genes” and of these the number of transcription factors are noted in each panel as “TF.” (b) Venn diagrams showing the genes that are one-to-one orthologous transcription factors and differentially expressed in each species to a FDR threshold of 0.05.



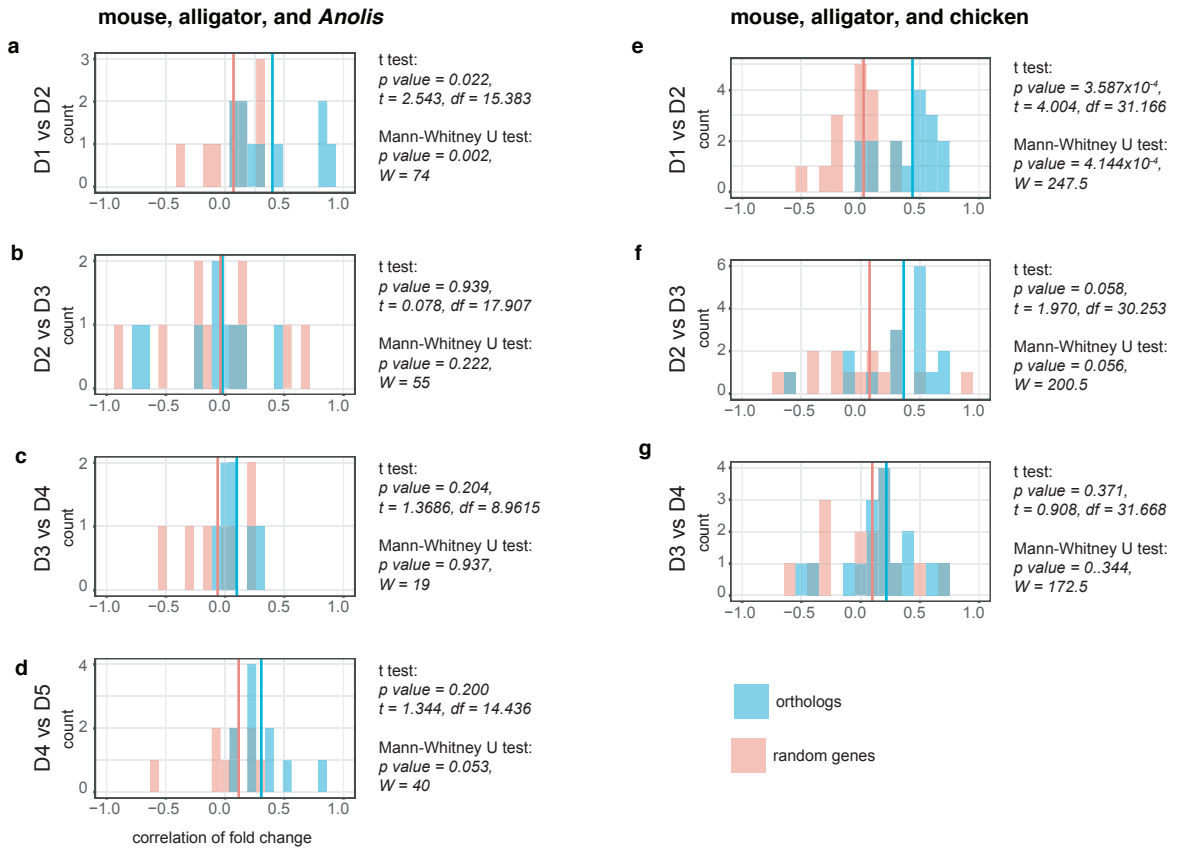

**Extended Data Figure 5 | Comparing fold change of differentially expressed genes to random genes.** Fold change of genes differentially expressed between adjacent digits for one species was compared to those of orthologous genes in other species and also to randomly selected genes of similar expression level for the other species. Comparisons were made among the pentadactyl limbs (a-d), and also considering chicken, rather than *Anolis* (e-g). Broadly, genes differentially expressed between D1 and D2 behave consistently between species. Among more posterior digits there is limited evidence for conserved behavior. The genes number of genes recovered as differentially expressed at each position for each species are reported in Fig 3. and Extended Data Fig. 4 b. Vertical lines in each plot represent the mean values of correlation among comparisons between the sets of orthologous or random genes.

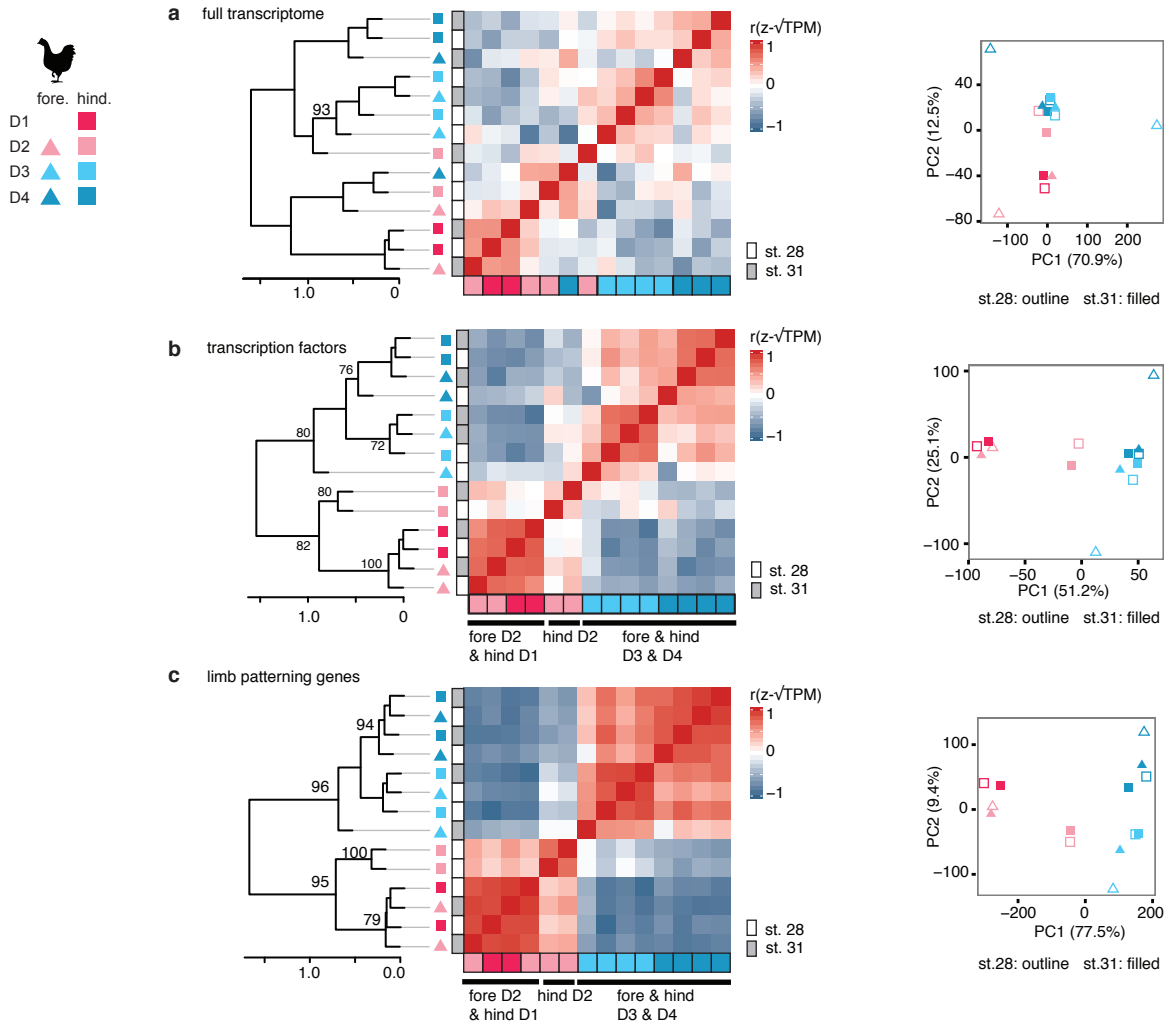

**Extended Data Figure 6 | Correspondence of chicken forelimb and hindlimb digits.** (a) PCA and HCA of full transcriptomes does not reveal correspondence between digits of the fore- and hindlimb. However, analyses of (b) all transcription factors and (c) limb patterning genes show that the three digits in the avian wing correspond to hindlimb digits D1, D3, and D4. Stage 28 and 31 samples are differentiated as filled or outlined points in PCA plot.

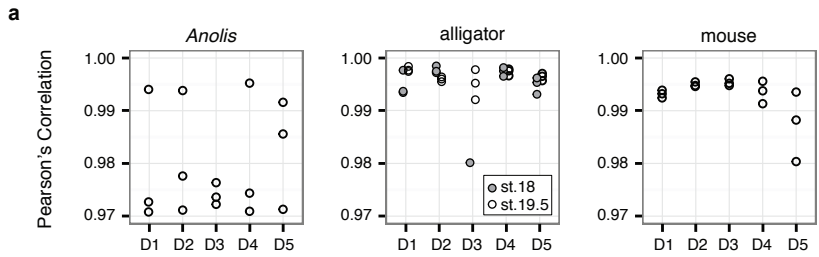

**b** Differential expression analyses of the two most-highly correlated replicates

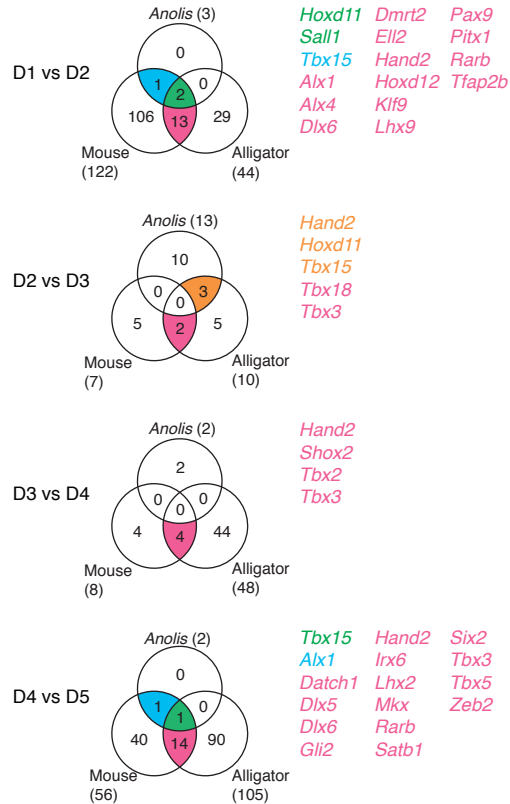

**Extended Data Figure 7 | Evaluating how differential expression analyses are impacted by variance of replicates.** (a) Pearson's correlation values of sample replicates showing that in *Anolis* replicates are less highly correlated than the replicates of mouse and alligator; however, for the digits D1, D2, D4 and D5 two of the three replicates are correlated with values comparable to the other species (>0.99). Therefore, to assess whether variance in *Anolis* was biasing our analyses, tests of differential expression were replicated using only the two most-highly correlated replicates of each digit. (b) Venn diagrams of one-to-one orthologous transcription factors genes identified as differentially expressed between adjacent digits with a FDR threshold of 0.05 when differential expression analyses considered only the two most-highly correlated samples of each digit.

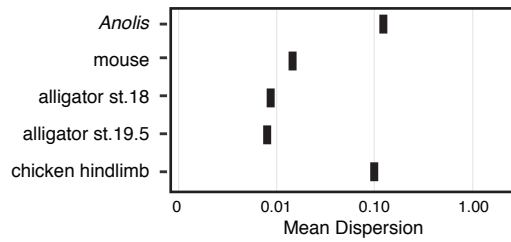

**Extended Data Figure 8 | Mean dispersion values of the digit transcriptomes.** Values calculated by edgeR showing that although pedigree likely impacts tests of differential gene expression, it does not explain the homogeneity of the *Anolis* digits.

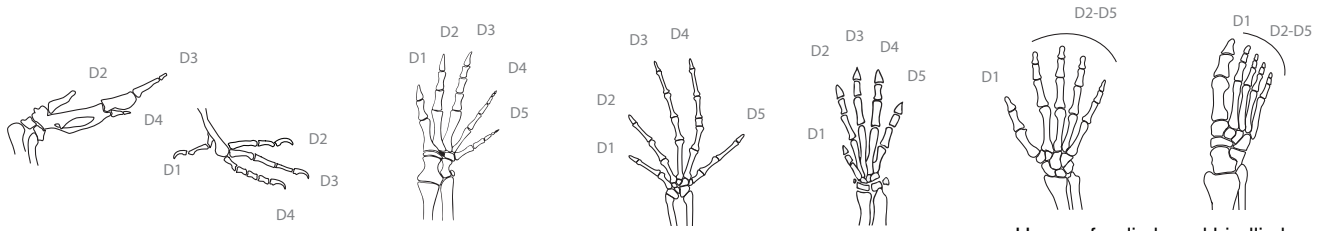

**Chicken forelimb and hindlimb**

- Published data set: Wang et al. 2011
- Sampled at st.28 and 31
- One sample per digit for each time point
- Each sample contained 20 pooled digits

**Alligator forelimb**

- Sampled at st.18 and 19.5
- 3 replicates per digit
- Each replicate contained 5 pooled digits

**Anolis forelimb**

- Sampled at st.10
- 3 replicates per digit
- Each replicate contained 5 pooled digits

**Mouse forelimb**

- Sampled at st.18 (E13.5)
- 3 replicates per digit
- Each replicate contained 5 pooled digits

**Human forelimb and hindlimb**

- Sampled at st.18
- 2 replicates per sample type, designated a and b when plotted on Fig. 2 b.
- One sample of each type from Individual 1; one sample of each forelimb type from Individual 2; one sample of each hindlimb type from Individual 3

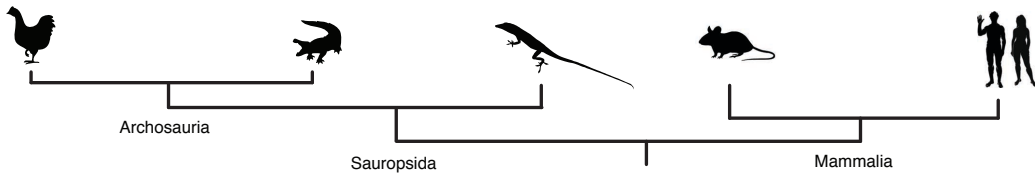

**Extended Data Figure 9 | Summary of the data sampled.** Illustrations are of the adult skeletons from the dorsal perspective, anterior is left. ‘Replicates’ refer to biological replicates.

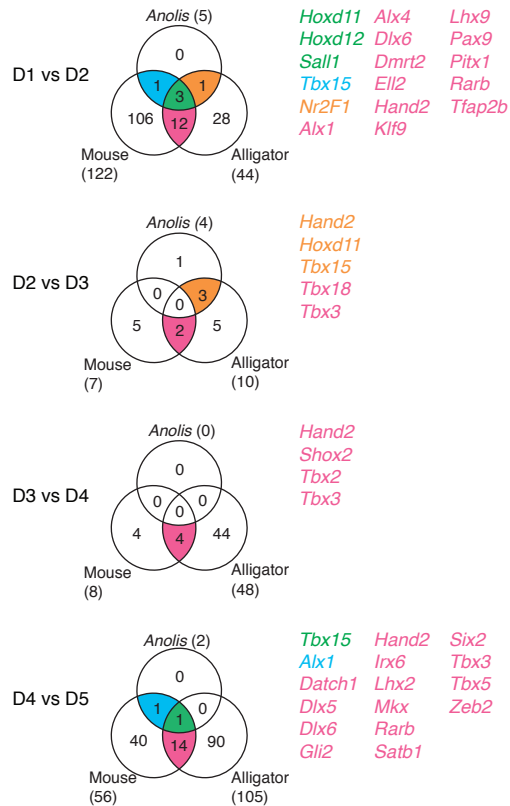

**Extended Data Figure 10 | Differential expression analyses of adjacent digits without PC1 correction of *Anolis* data.** Venn diagrams of one-to-one orthologous transcription factors genes for mouse, alligator, and *Anolis* that were identified as differentially expressed between adjacent digits with a FDR threshold of 0.05.

**Extended Data Table 1 | Human and mouse phenotypes have been described for 28 of the 49 CDEGs**

| <b>gene</b>   | <b>human phenotype or syndrome</b>                                                                           | <b>mouse phenotypes</b>                                                                                              |
|---------------|--------------------------------------------------------------------------------------------------------------|----------------------------------------------------------------------------------------------------------------------|
| <i>Alx1</i>   | Camptodactyly [2]                                                                                            | polydactyly [4]                                                                                                      |
| <i>Dlx5</i>   | Split hand/foot malformation [1,3]                                                                           | ectrodactyly, monodactyly, syndactyly [4]                                                                            |
| <i>Dlx6</i>   |                                                                                                              | brachydactyly, ectrodactyly, syndactyly [4]                                                                          |
| <i>En1</i>    |                                                                                                              | 25 phenotypes including adactyly, ectopic digits, polydactyly, syndactyly, truncation of digits, fused phalanges [4] |
| <i>Ets2</i>   | Chitayat syndrome [3]                                                                                        |                                                                                                                      |
| <i>Hand1</i>  |                                                                                                              | hypoplastic limb buds [4]                                                                                            |
| <i>Hand2</i>  |                                                                                                              | 19 phenotypes including oligodactyly, polydactyly, abnormal pollex morphology [4]                                    |
| <i>Hic1</i>   | Hand-foot-genital syndrome [1]                                                                               | abnormal fore- and hindlimb morphology [4]                                                                           |
| <i>Hoxa13</i> | Guttmacher syndrome [1,2], Hand-foot-genital syndrome [1,3], Postaxial hand polydactyly [2]                  | 21 phenotypes including brachydactyly, clinodactyly, syndactyly [4]                                                  |
| <i>Hoxd11</i> |                                                                                                              | 7 phenotypes including abnormal phalanx, abnormal and fused carpals [4]                                              |
| <i>Hoxd12</i> |                                                                                                              | 16 phenotypes including brachyphalangia, brachydactyly, clinodactyly, oligodactyly [4]                               |
| <i>Hoxd13</i> | Brachydactyly-syndactyly syndrome [1], VACTERL association, Brachydactyly type E [2]                         | 29 phenotypes including brachydactyly, ectrodactyly, polydactyly, polysyndactyly [4]                                 |
| <i>Nkx3-2</i> | Spondylo-megaepiphyseal-metaphyseal dysplasia [3]                                                            |                                                                                                                      |
| <i>Pax9</i>   |                                                                                                              | polydactyly, polysyndactyly [4]                                                                                      |
| <i>Pitx1</i>  | Clubfoot and Lower limb malformations [1], Liebenberg syndrome [3]                                           | 11 phenotypes including brachydactyly, oligodactyly, and clubfoot [4]                                                |
| <i>Runx2</i>  | Brachydactyly [1], MDMHB [3], cleidocranial dysplasia (which includes abnormal thumbs and brachydactyly) [4] | 10 phenotypes including abnormal phalanx morphology [4]                                                              |
| <i>Sall1</i>  | Townes-Brocks Syndrome [1,2,3], Lenz microphthalmia syndrome [2]                                             | 10 phenotypes including oligodactyly, preaxial polydactyly, syndactyly and triphalangia [4]                          |
| <i>Satb2</i>  | chromosome 2q32-q33 deletion syndrome (which includes clinodactyly archnodactyly, and Talpes equinovarus [4] |                                                                                                                      |
| <i>Sox10</i>  | kallmann-syndrome [3], Klein-Waardenburg syndrome [3], PCWH syndrome (which includes Pes cavus) [4]          |                                                                                                                      |
| <i>Tbx2</i>   | 17q23.1q23.2 microdeletion syndrome [2]                                                                      | Polydactyly, postaxial polydactyly [4]                                                                               |
| <i>Tbx3</i>   | Ulnar-mammary syndrome [1], Limb-mammary syndrome [2], post-axial polydactyly [2]                            | 16 phenotypes including oligodactyly [4]                                                                             |

|               |                                                                                         |                                                         |
|---------------|-----------------------------------------------------------------------------------------|---------------------------------------------------------|
| <i>Tbx5</i>   | Holt-Oram syndrome [1,2]                                                                | 10 phenotypes including abnormal phalanx morphology [4] |
| <i>Tbx15</i>  | Cousin syndrome (which includes brachydactyly) [1,2]                                    | 9 phenotypes including abnormal phalanx morphology [4]  |
| <i>Tfap2b</i> | Char syndrome [1,2]                                                                     | Polydactyly, postaxial polydactyly [4]                  |
| <i>Trps1</i>  | Trichorhinophalangeal syndrome type 1 [1,2], type 2 [2], and type 3 [2]                 |                                                         |
| <i>Twist2</i> | Ablepharon macrostomia syndrome [2]                                                     |                                                         |
| <i>Zic2</i>   |                                                                                         | 6 phenotypes mostly restricted to carpals [4]           |
| <i>Zic3</i>   | VACTERL association [2], Radial abnormalities [2], aplasia/Hypoplasia of the radius [2] |                                                         |

## References

- [1] Stenson *et al.* The Human Gene Mutation Database (HGMD®): 2003 Update. *Hum. Mutat.* **21**, 577-581 (2003)
- [2] NIH Genetic and Rare Disease Information Center. <http://rarediseases.info.nih.gov>.
- [3] National Library of Medicine (US). Genetics Home Reference [Internet]. <https://ghr.nlm.nih.gov> (2013).
- [4] Blake JA *et al.* Mouse Genome Database (MGD)-2017: community knowledge resource for the laboratory mouse. *Nucl. Acids Res.* **4**, D723-D729 (2017).
